# Supplementary material for: A central role for TRPS1 in the control of cell cycle and cancer development
Source: PubMed Central journal article supplement (PMC4202153; doi:10.18632/oncotarget.2291), 2014-07-31
Supplement: oncotarget-05-7677-s001.pdf [file oncotarget-05-7677-s001.pdf]

# A central role for TRPS1 in the control of cell cycle and cancer development

## Supplementary Material

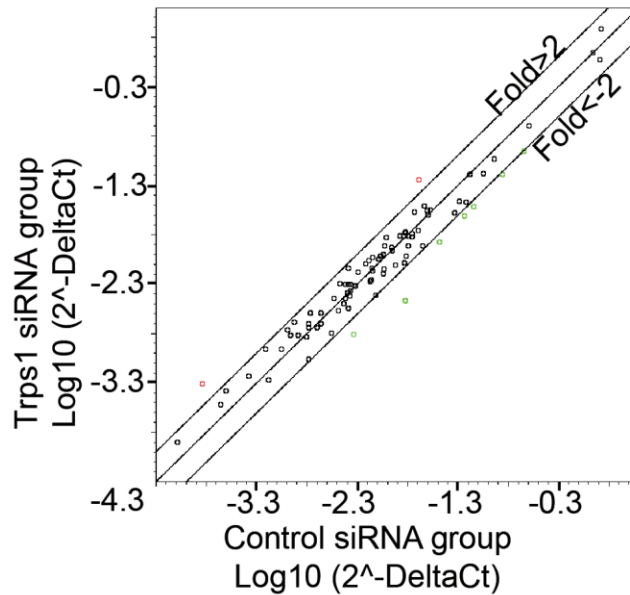

Figure S1. Scatterplot decipher the human cell cycle RT2 Profiler PCR Array data containing 84 tested cell cycle-related genes. Green and red circles indicate significantly down- and up-regulated genes, respectively.

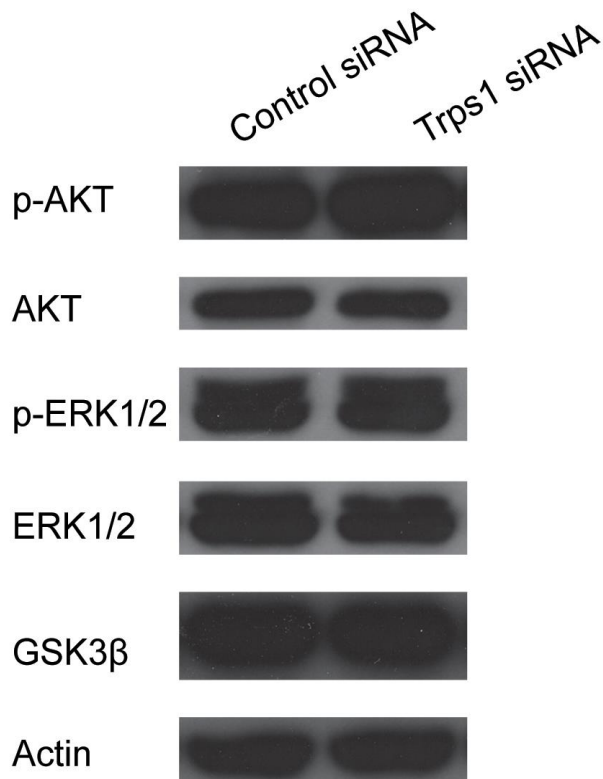

Figure S2. The effects of TRPS1 silencing on EGF-R/HER2 signaling pathway downstream targets: AKT, ERK1/2 and GSK 3 $\beta$ .

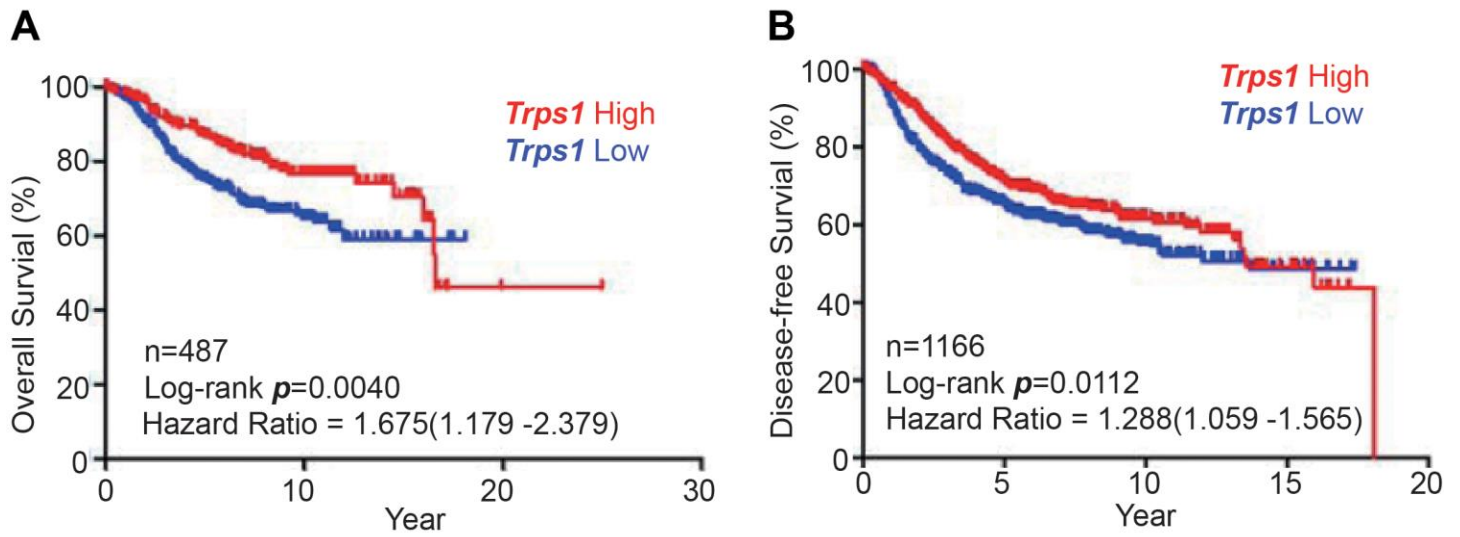

Figure S3. Prognostic value of *Trps1* expression in breast cancers. (A) Comparison of overall survival of breast cancer patients with high and low *Trps1* expression. (B) Comparison of disease-free survival of breast cancer patients with high and low *Trps1* expression.

Supplementary Table 1. TRPS1 interactomes

| Protein ID | Protein names                                              | Gene name  | PepCount | UniquePep | CoverPerce |
|------------|------------------------------------------------------------|------------|----------|-----------|------------|
| Q9UHF7     | Zinc finger transcription factor Trps1 (Tricho-r           | TRPS1      | 74       | 29        | 28.10%     |
| P35580     | Myosin-10 (Cellular myosin heavy chain, type               | MYH10      | 25       | 22        | 13.87%     |
| F8W6L6     | Myosin-10                                                  | MYH10      | 25       | 22        | 13.76%     |
| P42166     | Lamina-associated polypeptide 2, isoform alpl              | TMPO LAP2  | 29       | 18        | 32.56%     |
| F2Z2U8     | Myosin-14                                                  | MYH14      | 16       | 15        | 8.04%      |
| G8JLL9     | Myosin-14                                                  | MYH14      | 16       | 15        | 8.01%      |
| Q7Z406     | Myosin-14 (Myosin heavy chain 14) (Myosin h                | MYH14 KIA  | 16       | 15        | 8.17%      |
| B4DE59     | cDNA FLJ60424, highly similar to Junction plakoglobin      |            | 14       | 12        | 19.72%     |
| P42167     | Lamina-associated polypeptide 2, isoforms be               | TMPO LAP2  | 17       | 11        | 27.97%     |
| B4DPP6     | cDNA FLJ54371, highly similar to Serum albumin             |            | 30       | 9         | 13.11%     |
| P02533     | Transferrin receptor protein 1 (TR) (TfR) (TfR1            | TFRC       | 11       | 9         | 15.68%     |
| F5GWP8     | Junction plakoglobin                                       | JUP        | 10       | 9         | 12.69%     |
| P38646     | Stress-70 protein, mitochondrial (75 kDa gluc              | HSPA9 GRP  | 9        | 9         | 14.87%     |
| Q8N1C8     | HSPA9 protein (Fragment)                                   | HSPA9      | 9        | 9         | 14.83%     |
| B7Z4V2     | cDNA FLJ51907, highly similar to Stress-70 protein, mitocl |            | 9        | 9         | 15.19%     |
| B7Z4T3     | cDNA FLJ51903, highly similar to Stress-70 protein, mitocl |            | 9        | 9         | 15.98%     |
| P51114     | Fragile X mental retardation syndrome-relate               | FXR1       | 10       | 8         | 12.56%     |
| B4DXZ6     | Fragile X mental retardation syndrome-relate               | FXR1       | 10       | 8         | 12.83%     |
| B1PS43     | Myosin heavy chain 11 smooth muscle isoforr                | MYH11      | 9        | 8         | 4.34%      |
| P35749     | Myosin-11 (Myosin heavy chain 11) (Myosin h                | MYH11 KIA  | 9        | 8         | 4.46%      |
| B4DZW4     | cDNA FLJ57246, highly similar to Poly(A)-binding protein : |            | 10       | 7         | 11.51%     |
| E7EQV3     | Polyadenylate-binding protein 1                            | PABPC1     | 10       | 7         | 11.51%     |
| P11940     | Polyadenylate-binding protein 1 (PABP-1) (Po               | PABPC1 PA  | 10       | 7         | 10.69%     |
| B4DM78     | cDNA FLJ58199, highly similar to Fragile X mental retardat |            | 9        | 7         | 12.92%     |
| Q7Z417     | Nuclear fragile X mental retardation-interactir            | NUFIP2 KIA | 8        | 7         | 12.95%     |
| A1L3A7     | Nuclear fragile X mental retardation protein ir            | NUFIP2 hCG | 8        | 7         | 12.95%     |
| P09874     | Poly [ADP-ribose] polymerase 1 (PARP-1) (EC :              | PARP1 ADP  | 7        | 7         | 7.50%      |
| B2R5W3     | cDNA, FLJ92658, highly similar to Homo sapiens poly (ADP   |            | 7        | 7         | 7.50%      |
| P11021     | 78 kDa glucose-regulated protein (GRP-78) (E               | HSPA5 GRP  | 7        | 7         | 12.08%     |
| Q8NC56     | LEM domain-containing protein 2 (hLEM2)                    | LEMD2      | 6        | 6         | 11.33%     |
| Q8WWM7     | Ataxin-2-like protein (Ataxin-2 domain proteir             | ATXN2L A2  | 6        | 6         | 5.02%      |
| H3BUF6     | Ataxin-2-like protein                                      | ATXN2L     | 6        | 6         | 5.06%      |
| Q96HS1     | Serine/threonine-protein phosphatase PGAM                  | PGAM5      | 6        | 6         | 17.65%     |
| B2RDN9     | cDNA, FLJ96699, highly similar to Homo sapiens thyroid a   |            | 6        | 6         | 10.18%     |
| B4DE32     | cDNA FLJ53970, highly similar to ATP-dependent DNA hel     |            | 6        | 6         | 11.09%     |
| B1AHC9     | X-ray repair cross-complementing protein 6                 | XRCC6      | 6        | 6         | 11.09%     |
| P12956     | X-ray repair cross-complementing protein 6 (E              | XRCC6 G22  | 6        | 6         | 10.18%     |
| Q04837     | Single-stranded DNA-binding protein, mitochc               | SSBP1 SSBF | 7        | 5         | 37.84%     |
| A4D1U3     | Single-stranded DNA-binding protein                        | SSBP1 hCG  | 7        | 5         | 37.84%     |
| Q567R6     | Single-stranded DNA-binding protein                        | SSBP1      | 7        | 5         | 37.84%     |
| P07437     | Tubulin beta chain (Tubulin beta-5 chain)                  | TUBB TUBE  | 6        | 5         | 14.41%     |
| B4DY90     | cDNA FLJ56903, highly similar to Tubulin beta-7 chain      |            | 6        | 5         | 13.79%     |
| Q5JP53     | Tubulin beta chain                                         | TUBB       | 6        | 5         | 15.02%     |
| B7ZAF0     | cDNA, FLJ79164, highly similar to Tubulin beta-7 chain     |            | 6        | 5         | 15.42%     |
| Q5SU16     | Beta 5-tubulin (Beta-tubulin protein) (Tubulin,            | TUBB OK/S  | 6        | 5         | 14.41%     |
| P08779     | Keratin, type I cytoskeletal 16 (Cytokeratin-16            | KRT16 KRT: | 6        | 5         | 8.88%      |
| Q13310     | Polyadenylate-binding protein 4 (PABP-4) (Po               | PABPC4 AP  | 6        | 5         | 7.92%      |
| B1ANR0     | Poly(A) binding protein, cytoplasmic 4 (Inducil            | PABPC4 hC  | 6        | 5         | 8.29%      |

|        |                                                  |              |   |   |        |
|--------|--------------------------------------------------|--------------|---|---|--------|
| Q6IQ30 | PABPC4 protein                                   | PABPC4       | 6 | 5 | 7.73%  |
| P50402 | Emerin                                           | EMD EDMC     | 5 | 5 | 19.29% |
| Q00059 | Transcription factor A, mitochondrial (mtTFA)    | TFAM TCF6    | 5 | 4 | 13.41% |
| E5KSU5 | Mitochondrial transcription factor A (Transcrip  | TFAM hCG_    | 5 | 4 | 13.41% |
| H7BYN3 | Transcription factor A, mitochondrial (Fragme    | TFAM         | 5 | 4 | 15.07% |
| E5KSX8 | Mitochondrial transcription factor A             |              | 5 | 4 | 13.41% |
| Q6LES8 | TFAM protein (Fragment)                          | TFAM         | 5 | 4 | 13.41% |
| J3QRK5 | Protein UBBP4                                    | UBBP4        | 5 | 4 | 16.16% |
| P27694 | Replication protein A 70 kDa DNA-binding sub     | RPA1 REPA    | 4 | 4 | 6.82%  |
| P46781 | 40S ribosomal protein S9                         | RPS9         | 4 | 4 | 16.49% |
| A5D904 | RPS9 protein (Fragment)                          | RPS9         | 4 | 4 | 28.32% |
| B5MCT8 | 40S ribosomal protein S9 (Ribosomal protein      | RPS9 hCG_    | 4 | 4 | 23.02% |
| B7Z732 | cDNA FLJ61636, highly similar to 40S ribosomal   | protein S9   | 4 | 4 | 20.38% |
| C9JM19 | 40S ribosomal protein S9 (Ribosomal protein      | RPS9 hCG_    | 4 | 4 | 20.51% |
| P51116 | Fragile X mental retardation syndrome-relate     | FXR2 FMR1    | 4 | 4 | 5.94%  |
| Q08211 | ATP-dependent RNA helicase A (RHA) (EC 3.6.      | DHX9 DDX9    | 4 | 4 | 3.15%  |
| Q09666 | Neuroblast differentiation-associated protein    | AHNAK PM     | 4 | 4 | 0.80%  |
| Q92499 | ATP-dependent RNA helicase DDX1 (EC 3.6.4.       | DDX1         | 4 | 4 | 4.59%  |
| B4DPN6 | cDNA FLJ51031, highly similar to ATP-depend      | ent RNA heli | 4 | 4 | 5.47%  |
| A3RJH1 | ATP-dependent RNA helicase DDX1 (DEAD (As        | DDX1 hCG_    | 4 | 4 | 4.59%  |
| E5KLB5 | DNA ligase (EC 6.5.1.1)                          |              | 4 | 4 | 4.16%  |
| E5KLB6 | DNA ligase (EC 6.5.1.1)                          | LIG3 hCG_2   | 4 | 4 | 4.43%  |
| P49916 | DNA ligase 3 (EC 6.5.1.1) (DNA ligase III) (Poly | LIG3         | 4 | 4 | 4.16%  |
| K7EQB6 | 60S ribosomal protein L27                        | RPL27 hCG_   | 4 | 4 | 22.70% |
| K7ERZ5 | Histone H3.3 (Fragment)                          | H3F3B        | 4 | 4 | 7.71%  |
| B7Z6I3 | DNA ligase (EC 6.5.1.1)                          |              | 4 | 4 | 5.69%  |
| J3QRS3 | Myosin regulatory light chain 12A (Myosin reg    | MYL12A M     | 4 | 4 | 23.16% |
| Q53HL1 | Myosin regulatory light chain MRCL3 variant (    | Fragment)    | 4 | 4 | 23.98% |
| O14950 | Protein transport protein Sec16A (SEC16 hom      | SEC16A KIA   | 4 | 4 | 23.84% |
| P19105 | Myosin regulatory light chain 12A (Epididymis    | MYL12A M     | 4 | 4 | 23.98% |
| M0QZC5 | Inactive serine/threonine-protein kinase VRK     | VRK3         | 4 | 4 | 27.97% |
| P62280 | 40S ribosomal protein S11                        | RPS11        | 4 | 4 | 20.89% |
| Q8IY44 | CTBP2 protein                                    | CTBP2        | 4 | 4 | 6.63%  |
| P56545 | C-terminal-binding protein 2 (CtBP2)             | CTBP2        | 4 | 4 | 7.64%  |
| Q5SQP8 | C-terminal-binding protein 2                     | CTBP2        | 4 | 4 | 6.63%  |
| Q6PIK1 | IGL@ protein                                     | IGL@         | 5 | 3 | 8.94%  |
| Q71UI9 | Histone H2A.V (H2A.F/Z)                          | H2AFV H2A    | 4 | 3 | 37.50% |
| P0C055 | Histone H2A.Z (H2A/z)                            | H2AFZ H2A    | 4 | 3 | 37.50% |
| C9JOD1 | Histone H2A                                      | H2AFV        | 4 | 3 | 39.34% |
| Q8IWP6 | Class IVb beta tubulin                           |              | 4 | 3 | 8.31%  |
| Q8IZ29 | Tubulin, beta 2C                                 | TUBB2C       | 4 | 3 | 8.31%  |
| Q8N6N5 | Tubulin, beta 2C                                 | TUBB2C       | 4 | 3 | 8.31%  |
| B3KML9 | cDNA FLJ11352 fis, clone HEMBA1000020, high      | ly similar t | 4 | 3 | 9.32%  |
| P68371 | Tubulin beta-4B chain (Tubulin beta-2 chain) (   | TUBB4B TU    | 4 | 3 | 8.31%  |
| O94776 | Heat shock 70 kDa protein 4L (Heat shock 70-     | HSPA4L AP    | 3 | 3 | 4.49%  |
| P04792 | Non-histone chromosomal protein HMG-14 (H        | HMGN1 HM     | 3 | 3 | 17.07% |
| P06748 | Nucleophosmin (NPM) (Nucleolar phosphopr         | NPM1 NPM     | 3 | 3 | 8.50%  |
| A4ZU86 | Truncated nucleolar phosphoprotein B23           | NPM1         | 3 | 3 | 9.12%  |
| P13010 | X-ray repair cross-complementing protein 5 (     | XRCC5 G22    | 3 | 3 | 4.64%  |
| Q53T09 | Putative uncharacterized protein XRCC5 (Frag     | XRCC5        | 3 | 3 | 5.99%  |

|        |                                                                 |            |   |   |        |
|--------|-----------------------------------------------------------------|------------|---|---|--------|
| P16402 | Histone H1.3 (Histone H1c) (Histone H1s-2)                      | HIST1H1D   | 3 | 3 | 13.12% |
| P16403 | Histone H1.2 (Histone H1c) (Histone H1d) (His                   | HIST1H1C   | 3 | 3 | 13.62% |
| P10412 | Histone H1.4 (Histone H1b) (Histone H1s-4)                      | HIST1H1E   | 3 | 3 | 13.24% |
| A3R0T7 | Liver histone H1e                                               |            | 3 | 3 | 13.24% |
| A3R0T8 | Histone 1, H1e (Histone H1e)                                    | HIST1H1E   | 3 | 3 | 13.24% |
| Q4VB24 | Histone cluster 1, H1e                                          | HIST1H1E   | 3 | 3 | 13.24% |
| B2R984 | cDNA, FLJ94268, highly similar to Homo sapiens histone 1        |            | 3 | 3 | 13.24% |
| P16989 | Y-box-binding protein 3 (Cold shock domain-c                    | YBX3 CSDA  | 3 | 3 | 13.71% |
| P20700 | Lamin-B1                                                        | LMNB1 LM   | 3 | 3 | 4.95%  |
| P22626 | Heterogeneous nuclear ribonucleoproteins A2                     | HNRNPA2B   | 3 | 3 | 9.92%  |
| P52272 | Heterogeneous nuclear ribonucleoprotein M                       | (HNRNPM    | 3 | 3 | 3.70%  |
| P62269 | 40S ribosomal protein S18 (Ke-3) (Ke3)                          | RPS18 D6S  | 3 | 3 | 15.79% |
| P78527 | DNA-dependent protein kinase catalytic subu                     | PRKDC HYR  | 3 | 3 | 0.85%  |
| E7EUY0 | DNA-dependent protein kinase catalytic subu                     | PRKDC      | 3 | 3 | 0.85%  |
| Q07955 | Serine/arginine-rich splicing factor 1 (Alternat                | SRSF1 ASF  | 3 | 3 | 10.89% |
| Q59FA2 | Splicing factor, arginine/serine-rich 1 (Splicing factor 2, alt |            | 3 | 3 | 11.59% |
| J3KTL2 | Serine/arginine-rich-splicing factor 1 (Splicing                | SRSF1 SFRS | 3 | 3 | 10.67% |
| Q13363 | C-terminal-binding protein 1 (CtBP1) (EC 1.1.1.                 | CTBP1 CTBI | 3 | 3 | 5.91%  |
| Q4KMQ8 | C-terminal binding protein 1                                    | CTBP1      | 3 | 3 | 5.91%  |
| A8K486 | Peptidyl-prolyl cis-trans isomerase (EC 5.2.1.8)                |            | 3 | 3 | 17.58% |
| Q71V99 | Peptidyl-prolyl cis-trans isomerase (EC 5.2.1.8)                |            | 3 | 3 | 17.68% |
| B2RE56 | Peptidyl-prolyl cis-trans isomerase (EC 5.2.1.8)                |            | 3 | 3 | 17.58% |
| P62937 | Peptidyl-prolyl cis-trans isomerase A (PPlase                   | PPIA CYPA  | 3 | 3 | 17.58% |
| B2R491 | Ribosomal protein S4, X-linked, isoform CRA_                    | RPS4X hCG  | 3 | 3 | 7.22%  |
| Q53HV1 | Ribosomal protein S4, X-linked X isoform variant (Fragme        |            | 3 | 3 | 7.22%  |
| Q96IR1 | RPS4X protein (Fragment)                                        | RPS4X      | 3 | 3 | 7.82%  |
| P62701 | 40S ribosomal protein S4, X isoform (SCR10) (                   | RPS4X CCG  | 3 | 3 | 7.22%  |
| B4DUQ1 | cDNA FLJ54552, highly similar to Heterogeneous nuclear r        |            | 3 | 3 | 8.43%  |
| Q6IBN1 | HNRPK protein (Heterogeneous nuclear ribon                      | HNRPK HNI  | 3 | 3 | 7.97%  |
| Q5EC54 | Heterogeneous nuclear ribonucleoprotein K                       | HNRPK      | 3 | 3 | 7.97%  |
| P61978 | Heterogeneous nuclear ribonucleoprotein K                       | (HNRNPK HI | 3 | 3 | 7.99%  |
| Q5T6W5 | Heterogeneous nuclear ribonucleoprotein K                       | HNRNPK     | 3 | 3 | 8.64%  |
| E7EPN9 | Protein PRRC2C                                                  | PRRC2C     | 3 | 3 | 1.14%  |
| Q9Y520 | Protein PRRC2C (BAT2 domain-containing pro                      | PRRC2C BA  | 3 | 3 | 1.10%  |
| H0Y449 | Nuclease-sensitive element-binding protein 1                    | YBX1       | 3 | 3 | 12.30% |
| P67809 | Nuclease-sensitive element-binding protein 1                    | YBX1 NSEP  | 3 | 3 | 14.20% |
| Q6PKI6 | YBX1 protein (Fragment)                                         | YBX1       | 3 | 3 | 17.29% |
| Q05D43 | YBX1 protein (Fragment)                                         | YBX1       | 3 | 3 | 17.23% |
| Q2VIK8 | RcNSEP1 (Fragment)                                              |            | 3 | 3 | 14.42% |
| H0Y4R1 | Inosine-5'-monophosphate dehydrogenase 2                        | (IMPDH2    | 3 | 3 | 8.30%  |
| P12268 | Inosine-5'-monophosphate dehydrogenase 2                        | (IMPDH2 IM | 3 | 3 | 7.59%  |
| J3KPS3 | Fructose-bisphosphate aldolase (EC 4.1.2.13)                    | ALDOA hCC  | 3 | 3 | 8.42%  |
| P04075 | Heat shock protein beta-1 (HspB1) (28 kDa he                    | HSPB1 HSP  | 3 | 3 | 8.52%  |
| H3BQN4 | Fructose-bisphosphate aldolase (EC 4.1.2.13)                    | ALDOA      | 3 | 3 | 8.59%  |
| S6BGD6 | IgG L chain                                                     |            | 3 | 3 | 9.79%  |
| Q6IN99 | IGL@ protein                                                    | IGL@       | 3 | 3 | 9.79%  |
| Q6GMX3 | IGL@ protein                                                    | IGL@       | 3 | 3 | 9.75%  |
| Q567P1 | IGL@ protein                                                    | IGL@       | 3 | 3 | 9.79%  |
| Q8NEJ1 | Uncharacterized protein                                         |            | 3 | 3 | 9.75%  |
| O75531 | Metastasis-associated protein MTA2 (Metast                      | MTA2 MTA   | 5 | 2 | 33.71% |

|        |                                                                            |            |   |   |        |
|--------|----------------------------------------------------------------------------|------------|---|---|--------|
| Q59GP5 | Eukaryotic translation elongation factor 1 alpha 2 variant                 |            | 3 | 2 | 5.59%  |
| P14625 | Endoplasmic reticulum protein 94 kDa glucose-regulated protein HSP90B1 G   |            | 2 | 2 | 3.24%  |
| Q59FC6 | Tumor rejection antigen (Gp96) 1 variant (Fragment)                        |            | 2 | 2 | 4.51%  |
| Q5CAQ5 | Tumor rejection antigen (Gp96) 1                                           | TRA1       | 2 | 2 | 3.24%  |
| P16401 | Histone H1.5 (Histone H1a) (Histone H1b) (His HIST1H1B)                    |            | 2 | 2 | 9.29%  |
| P18124 | 60S ribosomal protein L7                                                   | RPL7       | 2 | 2 | 8.47%  |
| P18887 | DNA repair protein XRCC1 (X-ray repair cross-complementing protein 1)      | XRCC1      | 2 | 2 | 2.69%  |
| F5H8D7 | DNA repair protein XRCC1                                                   | XRCC1      | 2 | 2 | 2.82%  |
| Q59HH7 | X-ray repair cross complementing protein 1 variant (Fragment)              |            | 2 | 2 | 2.63%  |
| B4DEB2 | cDNA FLJ56491, highly similar to DNA-repair protein XRCC1                  |            | 2 | 2 | 4.25%  |
| P19338 | Nucleolin (Protein C23)                                                    | NCL        | 2 | 2 | 3.24%  |
| B3KTP9 | cDNA FLJ38578 fis, clone HCHON2007674, highly similar to Nucleolin         |            | 2 | 2 | 3.63%  |
| B3KM80 | Nucleolin, isoform CRA_c (cDNA FLJ10452 fis, NCL hCG_3)                    |            | 2 | 2 | 4.29%  |
| Q6ZS99 | cDNA FLJ45706 fis, clone FEBRA2028457, highly similar to Nucleolin         |            | 2 | 2 | 3.81%  |
| P26599 | Polypyrimidine tract-binding protein 1 (PTB) (PTBP1)                       | PTB        | 2 | 2 | 3.58%  |
| P49792 | E3 SUMO-protein ligase RanBP2 (EC 6.3.2.-) (3 RANBP2)                      | NL         | 2 | 2 | 0.87%  |
| P62263 | 40S ribosomal protein S14                                                  | RPS14 PRO  | 2 | 2 | 15.89% |
| P62277 | 40S ribosomal protein S13                                                  | RPS13      | 2 | 2 | 11.26% |
| P62854 | 40S ribosomal protein S26                                                  | RPS26      | 2 | 2 | 20.87% |
| Q75MH1 | HCG1745083 (Putative uncharacterized protein)                              | RPS26 LOC  | 2 | 2 | 20.87% |
| P63173 | 60S ribosomal protein L38                                                  | RPL38      | 2 | 2 | 24.29% |
| Q06830 | Peroxiredoxin-1 (EC 1.11.1.15) (Natural killer cell peroxidase)            | PRDX1 PAG  | 2 | 2 | 9.05%  |
| B2R4P2 | cDNA, FLJ92164, highly similar to Homo sapiens peroxidase                  |            | 2 | 2 | 9.05%  |
| Q14694 | Ubiquitin carboxyl-terminal hydrolase 10 (EC 3.4.22.15) (USP10)            | KIAA10     | 2 | 2 | 3.76%  |
| Q92900 | Regulator of nonsense transcripts 1 (EC 3.6.4.-) (UPF1)                    | KIAA1000   | 2 | 2 | 1.95%  |
| Q9Y3I0 | tRNA-splicing ligase RtcB homolog (EC 6.5.1.3) (RTCB)                      | C22orf42   | 2 | 2 | 2.97%  |
| A8MQB8 | Fragile X mental retardation protein 1                                     | FMR1       | 2 | 2 | 2.75%  |
| R9WNI0 | Fragile X mental retardation 1                                             | FMR1       | 2 | 2 | 2.94%  |
| Q06787 | Fragile X mental retardation protein 1 (FMRP)                              | FMR1       | 2 | 2 | 2.53%  |
| G3V0J0 | Fragile X mental retardation 1, isoform CRA_e                              | FMR1 hCG_3 | 2 | 2 | 2.70%  |
| G8JL90 | Fragile X mental retardation 1 isoform B (Fragment)                        | FMR1       | 2 | 2 | 2.62%  |
| R9WQY1 | Fragile X mental retardation 1                                             | FMR1       | 2 | 2 | 2.83%  |
| Q59GC1 | Fragile X mental retardation 1 variant (Fragment)                          |            | 2 | 2 | 3.04%  |
| B1AKN7 | Nuclear factor 1                                                           | NFIA       | 2 | 2 | 4.94%  |
| B1AKN5 | Nuclear factor 1                                                           | NFIA       | 2 | 2 | 4.72%  |
| B1AKN8 | Nuclear factor 1                                                           | NFIA       | 2 | 2 | 4.32%  |
| Q12857 | Nuclear factor 1 A-type (NF1-A) (Nuclear factor 1A)                        | NFIA KIAA1 | 2 | 2 | 4.52%  |
| B4DRN9 | Nuclear factor 1                                                           |            | 2 | 2 | 4.52%  |
| B4DLW8 | Probable ATP-dependent RNA helicase DDX5 (DDX5)                            |            | 2 | 2 | 3.36%  |
| B4DN41 | cDNA FLJ53366, highly similar to Probable ATP-dependent RNA helicase DDX5  |            | 2 | 2 | 2.99%  |
| P17844 | Probable ATP-dependent RNA helicase DDX5 (DDX5 G17P)                       |            | 2 | 2 | 2.93%  |
| J3KTA4 | Probable ATP-dependent RNA helicase DDX5                                   | DDX5       | 2 | 2 | 2.93%  |
| B4DMJ6 | cDNA FLJ50996, highly similar to 60S ribosomal protein L4                  |            | 2 | 2 | 4.11%  |
| P36578 | 60S ribosomal protein L4 (60S ribosomal protein L4)                        | RPL4 RPL1  | 2 | 2 | 3.98%  |
| Q59GY2 | Ribosomal protein L4 variant (Fragment)                                    |            | 2 | 2 | 3.85%  |
| H3BM89 | 60S ribosomal protein L4 (Ribosomal protein L4)                            | RPL4 hCG_3 | 2 | 2 | 5.11%  |
| B4DQN8 | cDNA FLJ50056, highly similar to Homo sapiens BAT2 domain                  |            | 2 | 2 | 2.33%  |
| B4DZQ7 | cDNA FLJ58652, highly similar to Probable ATP-dependent RNA helicase DDX17 |            | 2 | 2 | 5.48%  |
| Q59F66 | DEAD box polypeptide 17 isoform p82 variant (Fragment)                     |            | 2 | 2 | 3.12%  |
| H3BLZ8 | Probable ATP-dependent RNA helicase DDX17                                  | DDX17      | 2 | 2 | 3.15%  |

|        |                                                                                              |               |   |   |        |
|--------|----------------------------------------------------------------------------------------------|---------------|---|---|--------|
| C9JMU5 | Probable ATP-dependent RNA helicase DDX17                                                    | DDX17         | 2 | 2 | 3.53%  |
| Q92841 | Probable ATP-dependent RNA helicase DDX17                                                    | DDX17         | 2 | 2 | 3.16%  |
| B4E380 | Histone H3                                                                                   |               | 2 | 2 | 12.39% |
| K7ES00 | Alternative protein ADCY1                                                                    | ADCY1         | 2 | 2 | 9.27%  |
| K7EMV3 | Histone H3                                                                                   | H3F3B         | 2 | 2 | 15.22% |
| Q16695 | Histone H3.1t (H3/t) (H3t) (H3/g)                                                            | HIST3H3 H3t   | 2 | 2 | 10.29% |
| B4DEB1 | Histone H3                                                                                   | H3F3A         | 2 | 2 | 11.38% |
| P68431 | Histone H3.1 (Histone H3/a) (Histone H3/b) (H3t)                                             | HIST1H3A H3t  | 2 | 2 | 10.29% |
| Q71DI3 | Histone H3.2 (Histone H3/m) (Histone H3/o)                                                   | HIST2H3A H3o  | 2 | 2 | 10.29% |
| B7Z4T6 | Nuclear factor 1                                                                             |               | 2 | 2 | 4.33%  |
| P08651 | Nuclear factor 1 C-type (NF1-C) (Nuclear factor 1)                                           | NF1C NF1      | 2 | 2 | 4.33%  |
| Q6FI30 | Nuclear factor 1                                                                             | NF1C          | 2 | 2 | 4.41%  |
| B7Z5E7 | cDNA FLJ51046, highly similar to 60 kDa heat shock protein                                   |               | 2 | 2 | 4.06%  |
| B7Z597 | cDNA FLJ54373, highly similar to 60 kDa heat shock protein                                   |               | 2 | 2 | 3.72%  |
| P10809 | 60 kDa heat shock protein, mitochondrial (60 kDa)                                            | HSPD1 HSP     | 2 | 2 | 3.66%  |
| B3GQS7 | Mitochondrial heat shock 60kD protein 1 variant                                              | HSPD1         | 2 | 2 | 3.69%  |
| B7Z4F6 | cDNA FLJ54912, highly similar to 60 kDa heat shock protein                                   |               | 2 | 2 | 3.82%  |
| B7ZW41 | Heterogeneous nuclear ribonucleoprotein C-like                                               | LOC440563     | 2 | 2 | 6.48%  |
| A8K9A4 | cDNA FLJ75154, highly similar to Homo sapiens heterogeneous nuclear ribonucleoprotein C-like |               | 2 | 2 | 6.21%  |
| Q6PKD2 | HNRPCL1 protein (Fragment)                                                                   | HNRPCL1       | 2 | 2 | 9.18%  |
| G3V4W0 | Heterogeneous nuclear ribonucleoproteins C1                                                  | HNRNPC        | 2 | 2 | 7.25%  |
| B2R5W2 | cDNA, FLJ92657, highly similar to Homo sapiens heterogeneous nuclear ribonucleoprotein C1    |               | 2 | 2 | 6.55%  |
| P07910 | Heterogeneous nuclear ribonucleoproteins C1                                                  | HNRNPC H1     | 2 | 2 | 6.21%  |
| O60812 | Transcriptional adapter 3 (ADA3 homolog) (hADA3)                                             | ADA3          | 2 | 2 | 6.48%  |
| G3V576 | Heterogeneous nuclear ribonucleoproteins C1                                                  | HNRNPC        | 2 | 2 | 8.23%  |
| B2RXH8 | Heterogeneous nuclear ribonucleoprotein C-like                                               | LOC440563     | 2 | 2 | 6.48%  |
| B7ZW38 | LOC649330 protein                                                                            | LOC649330     | 2 | 2 | 6.48%  |
| G3V4C1 | Heterogeneous nuclear ribonucleoproteins C1                                                  | HNRNPC        | 2 | 2 | 6.51%  |
| G3V2Q1 | Heterogeneous nuclear ribonucleoproteins C1                                                  | HNRNPC        | 2 | 2 | 6.23%  |
| B4DY08 | Heterogeneous nuclear ribonucleoproteins C1                                                  | HNRNPC        | 2 | 2 | 6.60%  |
| B2R603 | cDNA, FLJ92712, highly similar to Homo sapiens heterogeneous nuclear ribonucleoprotein C1    |               | 2 | 2 | 6.27%  |
| D6REM6 | Matrin-3                                                                                     | MATR3         | 2 | 2 | 3.53%  |
| Q68D11 | Putative uncharacterized protein DKFZp686K2                                                  | DKFZp686K2    | 2 | 2 | 3.31%  |
| A8MXP9 | Matrin-3                                                                                     | MATR3         | 2 | 2 | 3.13%  |
| P43243 | Matrin-3                                                                                     | MATR3 KIAA    | 2 | 2 | 3.31%  |
| Q5ZEY3 | Glyceraldehyde-3-phosphate dehydrogenase                                                     | GAPD          | 2 | 2 | 25.58% |
| F8VPI7 | Double-stranded RNA-binding protein Staufer                                                  | STAU2         | 2 | 2 | 5.43%  |
| Q9NUL3 | Double-stranded RNA-binding protein Staufer                                                  | STAU2         | 2 | 2 | 4.56%  |
| E7EPX0 | Double-stranded RNA-binding protein Staufer                                                  | STAU2         | 2 | 2 | 5.30%  |
| E7EVI1 | Double-stranded RNA-binding protein Staufer                                                  | STAU2         | 2 | 2 | 6.67%  |
| B7Z1P6 | cDNA FLJ57953, highly similar to Double-stranded RNA-binding protein Staufer                 |               | 2 | 2 | 6.67%  |
| E7EVJ4 | Double-stranded RNA-binding protein Staufer                                                  | STAU2         | 2 | 2 | 5.09%  |
| A8K276 | cDNA FLJ78317, highly similar to Homo sapiens staufer, RNA binding protein                   |               | 2 | 2 | 5.43%  |
| E9PH62 | Double-stranded RNA-binding protein Staufer                                                  | STAU2         | 2 | 2 | 4.83%  |
| E5RJN7 | Double-stranded RNA-binding protein Staufer                                                  | STAU2         | 2 | 2 | 8.13%  |
| Q4LE57 | STAU2 variant protein (Fragment)                                                             | STAU2 variant | 2 | 2 | 5.31%  |
| Q2TBD5 | Staufen, RNA binding protein, homolog 2 (Drosophila)                                         | STAU2 hCG     | 2 | 2 | 5.43%  |
| HOYH81 | ATP synthase subunit beta (EC 3.6.3.14) (Fragment)                                           | ATP5B         | 2 | 2 | 8.56%  |
| F8VPV9 | ATP synthase subunit beta (EC 3.6.3.14)                                                      | ATP5B         | 2 | 2 | 5.98%  |
| QQQEN7 | ATP synthase subunit beta (EC 3.6.3.14) (Fragment)                                           | ATP5B         | 2 | 2 | 6.97%  |

|        |                                                                            |               |   |   |        |
|--------|----------------------------------------------------------------------------|---------------|---|---|--------|
| P06576 | Alpha-enolase (EC 4.2.1.11) (2-phospho-D-glyceraldehyde 3-phosphate lyase) | ENO1 ENO1     | 2 | 2 | 5.86%  |
| H0YHA7 | 60S ribosomal protein L18 (Fragment)                                       | RPL18         | 2 | 2 | 14.37% |
| Q0QEW2 | 60S ribosomal protein L18 (Fragment)                                       | RPL18         | 2 | 2 | 14.63% |
| G3V203 | 60S ribosomal protein L18                                                  | RPL18 hCG     | 2 | 2 | 14.63% |
| J3QQ67 | 60S ribosomal protein L18 (Fragment)                                       | RPL18         | 2 | 2 | 12.63% |
| Q07020 | 60S ribosomal protein L18                                                  | RPL18         | 2 | 2 | 12.77% |
| H7C4S4 | Fragile X mental retardation syndrome-related protein 1                    | FXR1          | 2 | 2 | 7.69%  |
| Q5RLJ0 | CLE                                                                        |               | 2 | 2 | 7.79%  |
| Q549M8 | CLE7 (Chromosome 14 open reading frame 16)                                 | C14orf166     | 2 | 2 | 7.79%  |
| Q9Y224 | UPF0568 protein C14orf166 (CLE7 homolog) (C14orf166)                       | C14orf166     | 2 | 2 | 7.79%  |
| Q5U0P9 | Purine-rich element binding protein A                                      |               | 2 | 2 | 4.35%  |
| Q00577 | Transcriptional activator protein Pur-alpha (Pur-alpha)                    | PURA PUR1     | 2 | 2 | 4.35%  |
| Q2NLD4 | PURA protein (Fragment)                                                    | PURA          | 2 | 2 | 4.91%  |
| Q56A79 | Purine-rich element binding protein A                                      | PURA          | 2 | 2 | 4.35%  |
| Q2NLC9 | PURA protein (Fragment)                                                    | PURA          | 2 | 2 | 4.67%  |
| Q5VVC8 | 60S ribosomal protein L11 (Fragment)                                       | RPL11         | 2 | 2 | 10.92% |
| Q5VVD0 | Ribosomal protein L11, isoform CRA_b (cDNA, RPL11 hCG)                     | RPL11 hCG     | 2 | 2 | 10.67% |
| P62913 | 60S ribosomal protein L11 (CLL-associated anti-CD22)                       | RPL11         | 2 | 2 | 10.67% |
| Q08ES8 | Cell growth-inhibiting protein 34                                          |               | 2 | 2 | 10.73% |
| Q5VVC9 | 60S ribosomal protein L11 (Fragment)                                       | RPL11         | 2 | 2 | 14.50% |
| Q6FI03 | G3BP protein                                                               | G3BP          | 2 | 2 | 6.22%  |
| F5H4D6 | Ras GTPase-activating protein-binding protein                              | G3BP1         | 2 | 2 | 10.21% |
| Q32P45 | GTPase activating protein (SH3 domain) binding protein                     | G3BP1         | 2 | 2 | 6.22%  |
| Q13283 | Ras GTPase-activating protein-binding protein                              | G3BP1 G3BP    | 2 | 2 | 6.22%  |
| B7Z8K4 | cDNA FLJ51772, highly similar to Ras-GTPase-activating protein             |               | 2 | 2 | 10.21% |
| Q5U0Q1 | Putative uncharacterized protein DKFZp686L1                                | DKFZp686L     | 2 | 2 | 6.22%  |
| Q6N092 | Putative uncharacterized protein DKFZp686K1                                | DKFZp686K     | 2 | 2 | 2.70%  |
| Q6PJX3 | STAU1 protein (Fragment)                                                   | STAU1         | 2 | 2 | 10.71% |
| O95793 | Ig kappa chain V-III region NG9 (Fragment)                                 |               | 2 | 2 | 3.64%  |
| Q5JW28 | Double-stranded RNA-binding protein                                        | Staufen STAU1 | 2 | 2 | 10.55% |
| Q59F99 | Staufen isoform b variant (Fragment)                                       |               | 2 | 2 | 3.55%  |
| Q5JW30 | Double-stranded RNA-binding protein                                        | Staufen STAU1 | 2 | 2 | 4.25%  |
| A8K622 | cDNA FLJ75871, highly similar to Homo sapiens staufen, R                   |               | 2 | 2 | 3.64%  |
| Q8NF17 | FLJ00385 protein (Fragment)                                                | FLJ00385      | 2 | 2 | 3.34%  |
| Q8WUW7 | Pyruvate kinase (EC 2.7.1.40) (Fragment)                                   | PKM2          | 2 | 2 | 5.83%  |
| P14618 | Pyruvate kinase PKM (EC 2.7.1.40) (Cytosolic type 2)                       | PKM OIP3 F    | 2 | 2 | 3.77%  |
| B4DRT3 | Pyruvate kinase (EC 2.7.1.40)                                              |               | 2 | 2 | 3.91%  |
| B4DNK4 | Pyruvate kinase (EC 2.7.1.40)                                              |               | 2 | 2 | 4.38%  |
| Q504U3 | Pyruvate kinase (EC 2.7.1.40)                                              | PKM2 PKM      | 2 | 2 | 5.46%  |
| H3BTN5 | Pyruvate kinase (EC 2.7.1.40) (Fragment)                                   | PKM           | 2 | 2 | 4.12%  |
| P05976 | Ig kappa chain V-IV region (Fragment)                                      | IGKV4-1       | 2 | 1 | 6.19%  |
| P08590 | Myosin light chain 3 (Cardiac myosin light chain 3)                        | MYL3          | 2 | 1 | 6.15%  |
| Q53R15 | Putative uncharacterized protein MYL1 (Fragment)                           | MYL1          | 2 | 1 | 8.57%  |
| B5BU24 | 14-3-3 protein beta/alpha                                                  | YWHAB         | 2 | 1 | 4.47%  |
| P31946 | 14-3-3 protein beta/alpha (Protein 1054) (Protein 1054)                    | YWHAB         | 2 | 1 | 4.47%  |
| E5RI35 | Acyl-protein thioesterase 1 (Fragment)                                     | LYPLA1        | 2 | 1 | 10.00% |
| C9J069 | Uncharacterized protein C9orf172                                           | C9orf172      | 1 | 1 | 0.92%  |
| O75528 | Barrier-to-autointegration factor (Breakpoint binding protein)             | BANF1 BAF     | 1 | 1 | 1.62%  |
| A8K899 | cDNA FLJ77724, highly similar to Homo sapiens transcript                   |               | 1 | 1 | 1.62%  |
| P01621 | Ig kappa chain V-IV region Len                                             |               | 1 | 1 | 9.00%  |



|        |                                                              |              |   |   |        |
|--------|--------------------------------------------------------------|--------------|---|---|--------|
| P02786 | Fructose-bisphosphate aldolase A (EC 4.1.2.13) (ALDOA)       | ALDOA        | 1 | 1 | 1.32%  |
| G3V0E5 | Transferrin receptor (P90, CD71), isoform CRATFRC            | hCG_         | 1 | 1 | 1.47%  |
| A8K6Q8 | cDNA FLJ75881, highly similar to Homo sapiens transferrin    |              | 1 | 1 | 1.32%  |
| P07237 | Protein disulfide-isomerase (PDI) (EC 5.3.4.1) (P4HB)        | ERBA         | 1 | 1 | 1.97%  |
| B4DLN6 | cDNA FLJ59033, highly similar to Protein disulfide-isomerase |              | 1 | 1 | 2.22%  |
| B4DNL5 | Protein disulfide-isomerase (EC 5.3.4.1)                     |              | 1 | 1 | 2.03%  |
| B3KTQ9 | Procollagen-proline, 2-oxoglutarate 4-dioxygenase            | P4HB hCG_    | 1 | 1 | 5.41%  |
| B4DUA5 | cDNA FLJ59430, highly similar to Protein disulfide-isomerase |              | 1 | 1 | 2.21%  |
| H7BZ94 | Protein disulfide-isomerase                                  | P4HB         | 1 | 1 | 2.16%  |
| F5H8J2 | Uncharacterized protein                                      | P4HB         | 1 | 1 | 2.22%  |
| H0Y3Z3 | Protein disulfide-isomerase (Fragment)                       | P4HB         | 1 | 1 | 3.65%  |
| Q96C96 | P4HB protein (Fragment)                                      | P4HB         | 1 | 1 | 3.66%  |
| P07339 | Cathepsin D (EC 3.4.23.5) [Cleaved into: Cathepsin D]        | CTSD         | 1 | 1 | 1.94%  |
| H7C1V0 | Cathepsin D light chain (Fragment)                           | CTSD         | 1 | 1 | 4.23%  |
| P09488 | Glutathione S-transferase Mu 1 (EC 2.5.1.18) (GSTM1)         | GS1          | 1 | 1 | 2.75%  |
| P28161 | Glutathione S-transferase Mu 2 (EC 2.5.1.18) (GSTM2)         | GS1          | 1 | 1 | 2.75%  |
| Q5T8R2 | Glutathione S-transferase M5, isoform CRA_b                  | GSTM5 hCG_   | 1 | 1 | 2.75%  |
| Q0D2I8 | Glutathione S-transferase mu 2 (Muscle)                      | GSTM2        | 1 | 1 | 2.75%  |
| Q03013 | Glutathione S-transferase Mu 4 (EC 2.5.1.18) (GSTM4)         |              | 1 | 1 | 2.75%  |
| P46439 | Glutathione S-transferase Mu 5 (EC 2.5.1.18) (GSTM5)         |              | 1 | 1 | 2.75%  |
| B9ZVX7 | Glutathione S-transferase Mu 1                               | GSTM1        | 1 | 1 | 4.03%  |
| E7EWW9 | Glutathione S-transferase Mu 1                               | GSTM1        | 1 | 1 | 2.53%  |
| E9PHN7 | Glutathione S-transferase Mu 2                               | GSTM2        | 1 | 1 | 3.35%  |
| Q5T8R1 | Glutathione S-transferase Mu 5                               | GSTM5        | 1 | 1 | 2.53%  |
| P11388 | DNA topoisomerase 2-alpha (EC 5.99.1.3) (DN TOP2A)           | TOP          | 1 | 1 | 0.52%  |
| P12235 | ADP/ATP translocase 1 (ADP,ATP carrier protein)              | SLC25A4 AI   | 1 | 1 | 2.68%  |
| P05141 | 60S acidic ribosomal protein P0 (60S ribosomal protein)      | RPLP0        | 1 | 1 | 2.68%  |
| P12236 | ADP/ATP translocase 3 (ADP,ATP carrier protein)              | SLC25A6 AI   | 1 | 1 | 2.68%  |
| Q6NVC0 | SLC25A5 protein (Fragment)                                   | SLC25A5      | 1 | 1 | 2.48%  |
| I7HJJ0 | ADP/ATP translocase 3 (Fragment)                             | SLC25A6      | 1 | 1 | 5.06%  |
| Q9H0C2 | ADP/ATP translocase 4 (ADP,ATP carrier protein)              | SLC25A31 AI  | 1 | 1 | 2.54%  |
| Q6I9V5 | SLC25A6 protein (Solute carrier family 25 (Mitochondrial))   | SLC25A6 hCG_ | 1 | 1 | 2.68%  |
| A8K787 | cDNA FLJ75273, highly similar to Homo sapiens solute carrier |              | 1 | 1 | 2.68%  |
| Q59EI9 | ADP,ATP carrier protein, liver isoform T2 variant (Fragment) |              | 1 | 1 | 2.48%  |
| P18077 | 60S ribosomal protein L35a (Cell growth-inhibitory)          | RPL35A GIC   | 1 | 1 | 6.36%  |
| F8WB72 | 60S ribosomal protein L35a                                   | RPL35A       | 1 | 1 | 12.28% |
| F8WBS5 | 60S ribosomal protein L35a                                   | RPL35A       | 1 | 1 | 12.73% |
| C9K025 | 60S ribosomal protein L35a (Fragment)                        | RPL35A       | 1 | 1 | 7.45%  |
| P18621 | 60S ribosomal protein L17 (60S ribosomal protein)            | RPL17        | 1 | 1 | 3.80%  |
| J3QQT2 | 60S ribosomal protein L17 (Fragment)                         | RPL17        | 1 | 1 | 4.09%  |
| J3QS96 | 60S ribosomal protein L17 (Fragment)                         | RPL17        | 1 | 1 | 5.07%  |
| J3QLC8 | 60S ribosomal protein L17                                    | RPL17        | 1 | 1 | 4.02%  |
| J3KSJ0 | 60S ribosomal protein L17 (Fragment)                         | RPL17        | 1 | 1 | 12.50% |
| J3KRB3 | 60S ribosomal protein L17 (Fragment)                         | RPL17        | 1 | 1 | 6.60%  |
| H0YMT1 | Talin-2 (Fragment)                                           | TLN2         | 1 | 1 | 0.48%  |
| G1UI21 | Talin-2                                                      | TLN2         | 1 | 1 | 0.44%  |
| J3KRX5 | 60S ribosomal protein L17 (Fragment)                         | RPL17        | 1 | 1 | 4.02%  |
| Q9Y4G6 | Talin-2                                                      | TLN2 KIAAC   | 1 | 1 | 0.28%  |
| P22061 | Protein-L-isoaspartate(D-aspartate) O-methyltransferase      | PCMT1        | 1 | 1 | 3.96%  |
| B7Z972 | Protein-L-isoaspartate(D-aspartate) O-methyltransferase      | PCMT1        | 1 | 1 | 4.69%  |

|        |                                                                  |        |   |   |        |
|--------|------------------------------------------------------------------|--------|---|---|--------|
| H7BY58 | Protein-L-isoaspartate(D-aspartate) O-methyltransferase          | PCMT1  | 1 | 1 | 3.15%  |
| P25705 | ATP synthase subunit alpha, mitochondrial                        | ATP5A1 | 1 | 1 | 1.45%  |
| K7ENP3 | 60S ribosomal protein L22 (Fragment)                             | RPL22  | 1 | 1 | 1.51%  |
| P28070 | Proteasome subunit beta type-4 (EC 3.4.25.1)                     | PSMB4  | 1 | 1 | 3.03%  |
| P30050 | 60S ribosomal protein L12                                        | RPL12  | 1 | 1 | 4.24%  |
| Q59FI9 | Ribosomal protein L12 variant (Fragment)                         |        | 1 | 1 | 3.55%  |
| P35251 | Replication factor C subunit 1 (Activator 1 140 kDa)             | RFC1   | 1 | 1 | 0.78%  |
| D6RAD2 | Replication factor C subunit 1 (Fragment)                        | RFC1   | 1 | 1 | 6.82%  |
| E0CX09 | Replication factor C subunit 1                                   | RFC1   | 1 | 1 | 6.92%  |
| P37108 | Signal recognition particle 14 kDa protein (SRP)                 | SRP14  | 1 | 1 | 10.29% |
| H0YLA2 | Signal recognition particle 14 kDa protein                       | SRP14  | 1 | 1 | 12.17% |
| P39023 | 60S ribosomal protein L3 (HIV-1 TAR RNA-binding protein)         | RPL3   | 1 | 1 | 2.98%  |
| B3KS36 | cDNA FLJ35376 fis, clone SKMUS2004044, highly similar to RPL3    |        | 1 | 1 | 3.39%  |
| B5MCW2 | 60S ribosomal protein L3 (Fragment)                              | RPL3   | 1 | 1 | 4.41%  |
| Q49AJ9 | RPL3 protein (Ribosomal protein L3, isoform C)                   | RPL3   | 1 | 1 | 4.78%  |
| G5E9G0 | 60S ribosomal protein L3 (Ribosomal protein L3)                  | RPL3   | 1 | 1 | 3.42%  |
| Q8TBW1 | Putative uncharacterized protein (Fragment)                      |        | 1 | 1 | 3.21%  |
| Q9NY85 | Ribosomal protein L3 (Fragment)                                  | rpl3   | 1 | 1 | 3.50%  |
| Q9BT63 | RPL3 protein (Fragment)                                          | RPL3   | 1 | 1 | 4.11%  |
| P41182 | B-cell lymphoma 6 protein (BCL-6) (B-cell lymphoma 6 protein)    | BCL6   | 1 | 1 | 1.13%  |
| A5PL18 | B-cell CLL/lymphoma 6                                            | BCL6   | 1 | 1 | 1.13%  |
| B4E2L2 | cDNA FLJ60220, highly similar to B-cell lymphoma 6 protein       |        | 1 | 1 | 1.18%  |
| P47914 | 60S ribosomal protein L29 (Cell surface heparin-binding protein) | RPL29  | 1 | 1 | 9.43%  |
| Q6IPI1 | Ribosomal protein L29                                            | RPL29  | 1 | 1 | 9.32%  |
| Q5T1D1 | Deleted.                                                         |        | 1 | 1 | 9.55%  |
| P49207 | 60S ribosomal protein L34                                        | RPL34  | 1 | 1 | 7.69%  |
| P55735 | Protein SEC13 homolog (SEC13-like protein 1)                     | SEC13  | 1 | 1 | 3.42%  |
| Q53GB2 | SEC13-like 1 isoform b variant (Fragment)                        |        | 1 | 1 | 3.42%  |
| E7ERC8 | Protein SEC13 homolog (Fragment)                                 | SEC13  | 1 | 1 | 12.79% |
| Q59FA6 | SEC13-like 1 isoform b variant (Fragment)                        |        | 1 | 1 | 3.63%  |
| A8MWR8 | cDNA FLJ59881, highly similar to SEC13-related protein           |        | 1 | 1 | 5.67%  |
| A4UCS7 | SEC13-like 1 isoform (Fragment)                                  |        | 1 | 1 | 6.21%  |
| A8MXL6 | Protein SEC13 homolog                                            | SEC13  | 1 | 1 | 3.87%  |
| P60174 | Triosephosphate isomerase (TIM) (EC 5.3.1.1)                     | TPI1   | 1 | 1 | 4.20%  |
| Q53HE2 | Triosephosphate isomerase (EC 5.3.1.1) (Fragment)                |        | 1 | 1 | 4.82%  |
| B4DUI5 | Triosephosphate isomerase (EC 5.3.1.1)                           |        | 1 | 1 | 5.63%  |
| Q2QD09 | Triosephosphate isomerase (EC 5.3.1.1) (Fragment)                |        | 1 | 1 | 4.82%  |
| P61247 | 40S ribosomal protein S3a (v-fos transforming protein)           | RPS3A  | 1 | 1 | 3.41%  |
| A8K4W0 | 40S ribosomal protein S3a                                        | RPS3A  | 1 | 1 | 3.41%  |
| D6RED7 | 40S ribosomal protein S3a (Fragment)                             | RPS3A  | 1 | 1 | 8.91%  |
| D6RAT0 | 40S ribosomal protein S3a                                        | RPS3A  | 1 | 1 | 3.96%  |
| Q6NXR8 | 40S ribosomal protein S3a                                        | RPS3A  | 1 | 1 | 3.41%  |
| D6RG13 | 40S ribosomal protein S3a (Fragment)                             | RPS3A  | 1 | 1 | 4.04%  |
| H0Y8L7 | 40S ribosomal protein S3a (Fragment)                             | RPS3A  | 1 | 1 | 4.74%  |
| D6RGE0 | 40S ribosomal protein S3a (Fragment)                             | RPS3A  | 1 | 1 | 13.85% |
| F5H4F9 | 40S ribosomal protein S3a                                        | RPS3A  | 1 | 1 | 5.14%  |
| D6RAS7 | 40S ribosomal protein S3a (Fragment)                             | RPS3A  | 1 | 1 | 7.20%  |
| E9PFI5 | 40S ribosomal protein S3a                                        | RPS3A  | 1 | 1 | 4.39%  |
| D6RB09 | 40S ribosomal protein S3a (Fragment)                             | RPS3A  | 1 | 1 | 4.64%  |
| B7Z3M5 | 40S ribosomal protein S3a                                        | RPS3A  | 1 | 1 | 5.14%  |

|        |                                                             |           |   |   |        |
|--------|-------------------------------------------------------------|-----------|---|---|--------|
| P62081 | 40S ribosomal protein S7                                    | RPS7      | 1 | 1 | 4.64%  |
| P62424 | 60S ribosomal protein L7a (PLA-X polypeptide RPL7A SUR      |           | 1 | 1 | 4.89%  |
| Q9BY74 | Ribosomal protein L7a (Fragment)                            | RP-L7a    | 1 | 1 | 9.15%  |
| Q5T8U2 | 60S ribosomal protein L7a (Ribosomal protein RPL7A RP1:     |           | 1 | 1 | 8.61%  |
| Q5T8U3 | 60S ribosomal protein L7a (Ribosomal protein RPL7A RP1:     |           | 1 | 1 | 6.81%  |
| P62750 | 60S ribosomal protein L23a                                  | RPL23A    | 1 | 1 | 8.33%  |
| B9EJE3 | 60S ribosomal protein L23A like (Uncharacteri RPL23AL       |           | 1 | 1 | 8.33%  |
| H7BY10 | 60S ribosomal protein L23a (Fragment)                       | RPL23A    | 1 | 1 | 8.23%  |
| K7ERT8 | DNA ligase 3 (Fragment)                                     | LIG3      | 1 | 1 | 7.43%  |
| A8MUS3 | 60S ribosomal protein L23a (Ribosomal protei RPL23A hCG     |           | 1 | 1 | 6.70%  |
| K7EMA7 | 60S ribosomal protein L23a                                  | RPL23A    | 1 | 1 | 18.57% |
| K7EJV9 | 60S ribosomal protein L23a (Fragment)                       | RPL23A    | 1 | 1 | 7.65%  |
| P62826 | GTP-binding nuclear protein Ran (Androgen re RAN ARA24      |           | 1 | 1 | 4.63%  |
| B5MDF5 | GTP-binding nuclear protein Ran (RAN, memb RAN hCG_1        |           | 1 | 1 | 4.29%  |
| J3KQE5 | GTP-binding nuclear protein Ran (Fragment)                  | RAN       | 1 | 1 | 4.27%  |
| B4DV51 | GTP-binding nuclear protein Ran (cDNA FLJ52: RAN            |           | 1 | 1 | 7.81%  |
| F5H018 | GTP-binding nuclear protein Ran (Fragment)                  | RAN       | 1 | 1 | 5.03%  |
| P62906 | 60S ribosomal protein L10a (CSA-19) (Neural r RPL10A NE     |           | 1 | 1 | 3.69%  |
| Q1JQ76 | Ribosomal protein (Fragment)                                | RPL10A    | 1 | 1 | 3.88%  |
| Q00610 | Clathrin heavy chain 1 (Clathrin heavy chain o CLTC CLH1;   |           | 1 | 1 | 0.66%  |
| Q01844 | RNA-binding protein EWS (EWS oncogene) (Ev EWSR1 EW         |           | 1 | 1 | 1.37%  |
| C9JGE3 | Ewing sarcoma breakpoint region 1, isoform C EWSR1 hCC      |           | 1 | 1 | 1.54%  |
| B0QYK0 | RNA-binding protein EWS                                     | EWSR1     | 1 | 1 | 1.46%  |
| H7BY36 | RNA-binding protein EWS (Fragment)                          | EWSR1     | 1 | 1 | 2.92%  |
| Q07065 | Cytoskeleton-associated protein 4 (63-kDa cyt CKAP4         |           | 1 | 1 | 1.83%  |
| Q6NWX1 | CKAP4 protein (Fragment)                                    | CKAP4     | 1 | 1 | 1.83%  |
| Q8TB01 | Similar to cytoskeleton-associated protein 4 (Fragment)     |           | 1 | 1 | 1.96%  |
| B3KVX6 | cDNA FLJ41699 fis, clone HCHON2004776, highly similar t     |           | 1 | 1 | 2.11%  |
| Q07283 | Trichohyalin                                                | TCHH THH  | 1 | 1 | 0.67%  |
| A2RRS3 | TCHH protein                                                | TCHH      | 1 | 1 | 3.76%  |
| Q13243 | Serine/arginine-rich splicing factor 5 (Delayed SRSF5 HRS   |           | 1 | 1 | 3.31%  |
| B4DJK0 | Serine/arginine-rich-splicing factor 5 (cDNA FL SRSF5       |           | 1 | 1 | 7.26%  |
| F6T1J1 | Serine/arginine-rich-splicing factor 4                      | SRSF4     | 1 | 1 | 5.70%  |
| A8K588 | cDNA FLJ76823, highly similar to Homo sapiens splicing fa   |           | 1 | 1 | 2.62%  |
| B4DUA4 | Serine/arginine-rich-splicing factor 5 (cDNA FL SRSF5       |           | 1 | 1 | 6.52%  |
| Q59EK7 | CS0DF038YO05 variant (Fragment)                             |           | 1 | 1 | 2.76%  |
| Q59GY3 | Arginine/serine-rich splicing factor 6 variant (Fragment)   |           | 1 | 1 | 3.23%  |
| Q53F45 | Splicing factor, arginine/serine-rich 4 variant (Fragment)  |           | 1 | 1 | 2.36%  |
| Q59EF5 | Splicing factor, arginine/serine-rich 4 variant (Fragment)  |           | 1 | 1 | 2.15%  |
| B4DEM8 | cDNA FLJ50118, highly similar to Splicing factor, arginine/ |           | 1 | 1 | 5.70%  |
| A8K644 | Splicing factor, arginine/serine-rich 4, isoform SFRS4 hCG_ |           | 1 | 1 | 1.82%  |
| Q08170 | Serine/arginine-rich splicing factor 4 (Pre-mRN SRSF4 SFRS  |           | 1 | 1 | 1.82%  |
| Q13247 | Serine/arginine-rich splicing factor 6 (Pre-mRN SRSF6 SFRS  |           | 1 | 1 | 2.62%  |
| Q13547 | Histone deacetylase 1 (HD1) (EC 3.5.1.98)                   | HDAC1 RPL | 1 | 1 | 2.49%  |
| Q6IT96 | Histone deacetylase (EC 3.5.1.98)                           | HDAC1 hCC | 1 | 1 | 2.49%  |
| B3KUJ5 | Histone deacetylase (EC 3.5.1.98)                           |           | 1 | 1 | 2.62%  |
| Q92769 | Histone deacetylase 2 (HD2) (EC 3.5.1.98)                   | HDAC2     | 1 | 1 | 2.46%  |
| B3KRS5 | Histone deacetylase (EC 3.5.1.98)                           | HDAC2 hCC | 1 | 1 | 2.62%  |
| F5GXM1 | Histone deacetylase 1                                       | HDAC1     | 1 | 1 | 4.15%  |
| Q5TEE2 | Histone deacetylase 1 (Fragment)                            | HDAC1     | 1 | 1 | 5.69%  |

|        |                                                          |            |   |   |        |
|--------|----------------------------------------------------------|------------|---|---|--------|
| J3KPW7 | Histone deacetylase 2                                    | HDAC2      | 1 | 1 | 2.06%  |
| B5BU61 | Histone deacetylase (EC 3.5.1.98)                        | HDAC1      | 1 | 1 | 2.49%  |
| B4DRG0 | cDNA FLJ51764, highly similar to Histone deacetylase 1   |            | 1 | 1 | 4.15%  |
| B4DSK9 | cDNA FLJ60860, highly similar to Histone deacetylase 1   |            | 1 | 1 | 5.06%  |
| B7Z3S4 | cDNA FLJ51981, highly similar to Histone deacetylase 1   |            | 1 | 1 | 6.90%  |
| Q14103 | Heterogeneous nuclear ribonucleoprotein D0               | HNRNP A1   | 1 | 1 | 3.94%  |
| B4DTC3 | Heterogeneous nuclear ribonucleoprotein D0               | HNRNP      | 1 | 1 | 4.62%  |
| Q12771 | P37 AUF1                                                 |            | 1 | 1 | 4.90%  |
| D6RAF8 | Heterogeneous nuclear ribonucleoprotein D0               | HNRNP      | 1 | 1 | 6.33%  |
| B4E0W4 | cDNA FLJ61020, highly similar to Heterogeneous nuclear r |            | 1 | 1 | 6.97%  |
| D6RF44 | Heterogeneous nuclear ribonucleoprotein D0               | HNRNP      | 1 | 1 | 12.50% |
| H0Y8G5 | Heterogeneous nuclear ribonucleoprotein D0               | HNRNP      | 1 | 1 | 5.36%  |
| F5H6R6 | Heterogeneous nuclear ribonucleoprotein D0               | HNRNP      | 1 | 1 | 6.97%  |
| H0YA96 | Heterogeneous nuclear ribonucleoprotein D0               | HNRNP      | 1 | 1 | 6.67%  |
| Q14166 | Tubulin--tyrosine ligase-like protein 12                 | TTL12 KIA  | 1 | 1 | 1.09%  |
| Q9BR23 | Putative uncharacterized protein (Fragment)              |            | 1 | 1 | 3.33%  |
| Q14839 | Chromodomain-helicase-DNA-binding protein CHD4           |            | 1 | 1 | 0.42%  |
| Q12873 | Chromodomain-helicase-DNA-binding protein CHD3           |            | 1 | 1 | 0.40%  |
| Q8TDI0 | Chromodomain-helicase-DNA-binding protein CHD5 KIAA      |            | 1 | 1 | 0.41%  |
| Q5TG85 | Chromodomain-helicase-DNA-binding protein CHD5           |            | 1 | 1 | 0.99%  |
| K7EMY3 | Chromodomain-helicase-DNA-binding protein CHD5           |            | 1 | 1 | 0.75%  |
| B3KRD4 | cDNA FLJ34067 fis, clone FCBBF3001914, highly similar to |            | 1 | 1 | 0.82%  |
| B3KY63 | cDNA FLJ16830 fis, clone UTERU3022536, highly similar to |            | 1 | 1 | 0.42%  |
| B4DLC6 | cDNA FLJ59330, highly similar to Chromodomain helicase   |            | 1 | 1 | 0.82%  |
| Q659F1 | Putative uncharacterized protein DKFZp434K2DKFZp434K     |            | 1 | 1 | 0.76%  |
| Q659D0 | Putative uncharacterized protein DKFZp434P2DKFZp434P     |            | 1 | 1 | 0.75%  |
| F5GWX5 | Chromodomain-helicase-DNA-binding protein CHD4           |            | 1 | 1 | 0.42%  |
| Q3KNS1 | Patched domain-containing protein 3 (Patche              | PTCHD3 PT  | 1 | 1 | 1.30%  |
| Q68DX3 | FERM and PDZ domain-containing protein 2 (FRMPD2 PI      |            | 1 | 1 | 0.76%  |
| B4E1N9 | cDNA FLJ53430, highly similar to Homo sapiens FERM anc   |            | 1 | 1 | 1.19%  |
| F8WCT2 | FERM and PDZ domain-containing protein 2                 | FRMPD2     | 1 | 1 | 0.78%  |
| Q6ZMW3 | Echinoderm microtubule-associated protein-li             | EML6 EML   | 1 | 1 | 0.41%  |
| Q7L2E3 | Putative ATP-dependent RNA helicase DHX30                | DHX30 DD   | 1 | 1 | 0.67%  |
| H7BXY3 | Putative ATP-dependent RNA helicase DHX30                | DHX30      | 1 | 1 | 0.69%  |
| Q7Z403 | Transmembrane channel-like protein 6 (Epide              | TMC6 EVEF  | 1 | 1 | 0.99%  |
| K7ENC4 | Transmembrane channel-like protein 6 (Fragm              | TMC6       | 1 | 1 | 5.23%  |
| B4E0Z0 | cDNA FLJ59111, moderately similar to Transmembrane ch    |            | 1 | 1 | 6.56%  |
| B3KTU5 | Transmembrane channel-like protein                       |            | 1 | 1 | 1.40%  |
| K7ERH0 | 60S ribosomal protein L22 (Ribosomal protein RPL22 hCG   |            | 1 | 1 | 2.80%  |
| K7ENM6 | Transmembrane channel-like protein 6 (Fragm              | TMC6       | 1 | 1 | 5.59%  |
| Q86VX9 | Vacuolar fusion protein MON1 homolog A                   | MON1A SA   | 1 | 1 | 1.26%  |
| Q8IV63 | Inactive serine/threonine-protein kinase VRK             | VRK3       | 1 | 1 | 2.32%  |
| M0QYA8 | Urokinase plasminogen activator surface rece             | PLAUR      | 1 | 1 | 2.71%  |
| B4DGW1 | Inactive serine/threonine-protein kinase VRK             | VRK3       | 1 | 1 | 4.53%  |
| M0R073 | Urokinase plasminogen activator surface rece             | PLAUR      | 1 | 1 | 3.04%  |
| Q8IXQ6 | Poly [ADP-ribose] polymerase 9 (PARP-9) (EC              | PARP9 BAL  | 1 | 1 | 1.52%  |
| B7Z5L6 | cDNA FLJ54723, highly similar to Poly (ADP-ribose) polym |            | 1 | 1 | 1.67%  |
| Q8IYJ3 | Synaptotagmin-like protein 1 (Exophilin-7) (Pr           | SYTL1 SLP1 | 1 | 1 | 1.25%  |
| Q8N880 | cDNA FLJ39853 fis, clone SPLEN2014911                    |            | 1 | 1 | 2.75%  |
| A8KAH3 | cDNA FLJ75170, highly similar to Homo sapiens synaptota  |            | 1 | 1 | 1.25%  |

|        |                                                           |             |   |   |        |
|--------|-----------------------------------------------------------|-------------|---|---|--------|
| Q8N999 | Uncharacterized protein C12orf29                          | C12orf29    | 1 | 1 | 3.08%  |
| Q8N9M5 | Transmembrane protein 102 (Common beta-c                  | TMEM102     | 1 | 1 | 3.15%  |
| Q8NAB2 | Kelch repeat and BTB domain-containing prot               | KBTBD3 BK   | 1 | 1 | 1.15%  |
| G3V161 | Kelch repeat and BTB (POZ) domain containin               | KBTBD3 hC   | 1 | 1 | 1.31%  |
| A8K1K0 | cDNA FLJ76341, highly similar to Homo sapiens kelch rep   |             | 1 | 1 | 1.14%  |
| Q8NCA5 | Protein FAM98A                                            | FAM98A      | 1 | 1 | 2.89%  |
| B4DT23 | Protein FAM98A (cDNA FLJ52744, highly simil               | FAM98A      | 1 | 1 | 4.64%  |
| B4DY25 | cDNA FLJ55866, highly similar to Protein FAM98A           |             | 1 | 1 | 4.30%  |
| E9PH82 | Protein FAM98A                                            | FAM98A      | 1 | 1 | 4.81%  |
| I6L9E8 | Family with sequence similarity 98, member A              | FAM98A      | 1 | 1 | 2.90%  |
| Q8TDB6 | E3 ubiquitin-protein ligase DTX3L (EC 6.3.2.-)            | (DTX3L BBA  | 1 | 1 | 2.03%  |
| Q8WXX0 | Dynein heavy chain 7, axonemal (Axonemal b                | DNAH7 KIA   | 1 | 1 | 0.15%  |
| Q92784 | Zinc finger protein DPF3 (BRG1-associated fac             | DPF3 BAF4   | 1 | 1 | 1.32%  |
| B7Z276 | cDNA FLJ57274, highly similar to Zinc-finger protein Dpf3 |             | 1 | 1 | 1.36%  |
| F8W7T1 | Zinc finger protein DPF3                                  | DPF3        | 1 | 1 | 1.21%  |
| F5H575 | Zinc finger protein DPF3                                  | DPF3        | 1 | 1 | 1.36%  |
| Q93008 | Probable ubiquitin carboxyl-terminal hydrolas             | USP9X DFFI  | 1 | 1 | 0.43%  |
| D3DWB6 | Ubiquitin carboxyl-terminal hydrolase (EC 3.4.            | USP9X hCG   | 1 | 1 | 0.46%  |
| Q96I24 | Far upstream element-binding protein 3 (FUSI              | FUBP3 FBP   | 1 | 1 | 1.75%  |
| Q96IX5 | Up-regulated during skeletal muscle growth p              | USMG5 DA    | 1 | 1 | 25.86% |
| Q96RR1 | Twinkle protein, mitochondrial (EC 3.6.4.12)              | (IPEO1 C10o | 1 | 1 | 2.49%  |
| E5KSY5 | Mitochondrial twinkle protein                             |             | 1 | 1 | 2.49%  |
| Q9H6V3 | C10orf2 protein (cDNA: FLJ21832 fis, clone HE             | C10orf2     | 1 | 1 | 3.36%  |
| Q99460 | 26S proteasome non-ATPase regulatory subur                | PSMD1       | 1 | 1 | 1.05%  |
| Q05CW6 | PSMD1 protein (Fragment)                                  | PSMD1       | 1 | 1 | 1.17%  |
| Q05BX4 | PSMD1 protein (Fragment)                                  | PSMD1       | 1 | 1 | 1.21%  |
| B2R6D0 | cDNA, FLJ92896, highly similar to Homo sapiens proteaso   |             | 1 | 1 | 1.05%  |
| Q9BVJ7 | Dual specificity protein phosphatase 23 (EC 3.            | DUSP23 LD   | 1 | 1 | 8.00%  |
| Q9C091 | GREB1-like protein                                        | GREB1L C1   | 1 | 1 | 0.36%  |
| B4DDS9 | cDNA FLJ53878, weakly similar to Homo sapiens GREB1 p     |             | 1 | 1 | 0.72%  |
| Q9H0U4 | Ras-related protein Rab-1B                                | RAB1B       | 1 | 1 | 3.98%  |
| Q92928 | Putative Ras-related protein Rab-1C (hRab1c)              | RAB1C       | 1 | 1 | 3.98%  |
| Q6FIG4 | RAB1B protein                                             | RAB1B       | 1 | 1 | 3.98%  |
| E9PLD0 | Ras-related protein Rab-1B                                | RAB1B       | 1 | 1 | 4.73%  |
| Q9NZB2 | Constitutive coactivator of PPAR-gamma-like               | FAM120A C   | 1 | 1 | 1.16%  |
| Q9P219 | Protein Daple (Coiled-coil domain-containing              | CCDC88C D   | 1 | 1 | 0.30%  |
| Q9Y4L1 | Hypoxia up-regulated protein 1 (150 kDa oxyg              | HYOU1 GRI   | 1 | 1 | 1.60%  |
| E9PL22 | Hypoxia up-regulated protein 1                            | HYOU1       | 1 | 1 | 1.71%  |
| B3KXH0 | cDNA FLJ45395 fis, clone BRHIP3027191, highly similar to  |             | 1 | 1 | 1.61%  |
| B7Z766 | cDNA FLJ54564, highly similar to 150 kDa oxygen-regulate  |             | 1 | 1 | 1.89%  |
| B7Z2N4 | cDNA FLJ56074, highly similar to 150 kDa oxygen-regulate  |             | 1 | 1 | 1.63%  |
| B7Z602 | cDNA FLJ59408, highly similar to 150 kDa oxygen-regulate  |             | 1 | 1 | 2.44%  |
| A2NOU5 | VH6DJ protein (Fragment)                                  | VH6DJ       | 1 | 1 | 6.42%  |
| A2NOT1 | VH6DJ protein (Fragment)                                  | VH6DJ       | 1 | 1 | 5.88%  |
| A8K129 | cDNA FLJ75032, highly similar to Homo sapiens unc-84 hc   |             | 1 | 1 | 1.26%  |
| B4E2A6 | cDNA FLJ55508, highly similar to Sad1/unc-84-like proteir |             | 1 | 1 | 1.20%  |
| B4DIU6 | cDNA FLJ59542, highly similar to Sad1/unc-84-like proteir |             | 1 | 1 | 1.27%  |
| J3KQE0 | SUN domain-containing protein 2                           | SUN2        | 1 | 1 | 1.27%  |
| Q6NT72 | UNC84B protein (Fragment)                                 | UNC84B      | 1 | 1 | 2.04%  |
| Q9UHQ9 | SUN domain-containing protein 2 (Protein unc              | SUN2 FRIG   | 1 | 1 | 1.26%  |

|        |                                                                        |   |   |        |
|--------|------------------------------------------------------------------------|---|---|--------|
| A8K3W4 | cDNA FLJ75163, highly similar to Homo sapiens heteroger                | 1 | 1 | 1.98%  |
| M0R3F1 | ATP-dependent RNA helicase DDX3X (EC 3.6.4 DDX3X DBX                   | 1 | 1 | 2.34%  |
| A8K5K0 | cDNA FLJ78309, highly similar to Homo sapiens heteroger                | 1 | 1 | 1.75%  |
| A8K6U7 | cDNA FLJ78252, highly similar to Homo sapiens heteroger                | 1 | 1 | 1.75%  |
| Q9BUJ2 | Heterogeneous nuclear ribonucleoprotein U-l  HNRNPUL1                  | 1 | 1 | 1.75%  |
| B7Z4B8 | Heterogeneous nuclear ribonucleoprotein U-l  HNRNPUL1                  | 1 | 1 | 1.96%  |
| A8K6A2 | cDNA FLJ77317, highly similar to Homo sapiens retinoblas               | 1 | 1 | 1.88%  |
| HOYCT5 | Histone-binding protein RBBP4 (Fragment) RBBP4                         | 1 | 1 | 4.44%  |
| B4DRT0 | Histone-binding protein RBBP4 (cDNA FLJ50118) RBBP4                    | 1 | 1 | 4.62%  |
| HOYF10 | Histone-binding protein RBBP4 (Fragment) RBBP4                         | 1 | 1 | 3.86%  |
| HOYEU5 | Histone-binding protein RBBP4 (Fragment) RBBP4                         | 1 | 1 | 4.79%  |
| E9PC52 | Histone-binding protein RBBP7 RBBP7                                    | 1 | 1 | 1.92%  |
| Q5JNZ6 | Histone-binding protein RBBP7 (Fragment) RBBP7                         | 1 | 1 | 9.41%  |
| HOYDK2 | Histone-binding protein RBBP4 (Fragment) RBBP4                         | 1 | 1 | 3.05%  |
| Q5JP02 | Histone-binding protein RBBP7 (Fragment) RBBP7                         | 1 | 1 | 4.57%  |
| Q16576 | Histone-binding protein RBBP7 (Histone acetylation) RBBP7 RBA          | 1 | 1 | 1.88%  |
| Q6FHQ0 | RBBP7 protein (Retinoblastoma binding protein) RBBP7 hCG               | 1 | 1 | 1.88%  |
| Q09028 | Histone-binding protein RBBP4 (Chromatin associated) RBBP4 RBA         | 1 | 1 | 1.88%  |
| A8K9U6 | cDNA FLJ76121, highly similar to Homo sapiens zinc finger              | 1 | 1 | 1.44%  |
| Q7Z2W4 | Zinc finger CCCH-type antiviral protein 1 (ADP ZC3HAV1 Z               | 1 | 1 | 1.44%  |
| C9J6P4 | Zinc finger CCCH-type antiviral protein 1 ZC3HAV1                      | 1 | 1 | 1.27%  |
| B1ALB6 | Neutrophil cytosol factor 2 (Fragment) NCF2                            | 1 | 1 | 8.93%  |
| Q9H9R6 | cDNA FLJ12587 fis, clone NT2RM4001217, moderately sim                  | 1 | 1 | 1.14%  |
| Q9H0H3 | Kelch-like protein 25 (Ectoderm-neural cortex) KLHL25 EN               | 1 | 1 | 0.85%  |
| B3KPR7 | cDNA FLJ32101 fis, clone OCBBF2001176, highly similar to               | 1 | 1 | 0.90%  |
| B1ALB7 | Neutrophil cytosol factor 2 (Fragment) NCF2                            | 1 | 1 | 3.50%  |
| Q59F14 | Neutrophil cytosol factor 2 variant (Fragment)                         | 1 | 1 | 0.84%  |
| P19878 | Neutrophil cytosol factor 2 (NCF-2) (67 kDa neutral) NCF2 NOX          | 1 | 1 | 0.95%  |
| B1AUU8 | Epidermal growth factor receptor substrate 1 EPS15                     | 1 | 1 | 1.31%  |
| Q7Z5V0 | EPS15 protein                                                          | 1 | 1 | 1.31%  |
| B2R4C5 | Lysozyme (EC 3.2.1.17) (Lysozyme (Renal amyloid) LYZ hCG_2)            | 1 | 1 | 6.08%  |
| F8VV32 | Lysozyme C LYZ                                                         | 1 | 1 | 8.65%  |
| P61626 | Lysozyme C (EC 3.2.1.17) (1,4-beta-N-acetylmuramidase) LYZ LZM         | 1 | 1 | 6.08%  |
| B2R4D8 | 60S ribosomal protein L27                                              | 1 | 1 | 6.62%  |
| K7ELC7 | 60S ribosomal protein L27 (Fragment) RPL27                             | 1 | 1 | 6.25%  |
| E4W6B6 | RPL27/NME2 fusion protein (Fragment) RPL27                             | 1 | 1 | 7.14%  |
| P61353 | 60S ribosomal protein L27 RPL27                                        | 1 | 1 | 6.62%  |
| K7EQQ9 | Transmembrane channel-like protein 6 (Fragment) TMC6                   | 1 | 1 | 11.25% |
| B2R6F3 | Splicing factor arginine/serine-rich 3 (Splicing factor) SFRS3 hCG     | 1 | 1 | 8.54%  |
| B4DEK2 | cDNA FLJ59182, highly similar to Splicing factor, arginine/            | 1 | 1 | 8.48%  |
| Q16629 | Serine/arginine-rich splicing factor 7 (Splicing factor) SRSF7 SFRS    | 1 | 1 | 5.88%  |
| B4E241 | Serine/arginine-rich-splicing factor 3 (Splicing factor) SRSF3 SFRS    | 1 | 1 | 11.29% |
| C9JAB2 | Serine/arginine-rich-splicing factor 7 SRSF7                           | 1 | 1 | 5.96%  |
| P84103 | Serine/arginine-rich splicing factor 3 (Pre-mRNA splicing) SRSF3 SFRS  | 1 | 1 | 8.54%  |
| B2RAN6 | cDNA, FLJ95025, highly similar to Homo sapiens transcript              | 1 | 1 | 2.22%  |
| Q92754 | Transcription factor AP-2 gamma (AP2-gamma) TFAP2C                     | 1 | 1 | 2.22%  |
| B4DWK3 | Transcription factor AP-2 gamma (cDNA FLJ50118) TFAP2C                 | 1 | 1 | 3.56%  |
| B2RE88 | cDNA, FLJ96465, highly similar to Homo sapiens solute ca               | 1 | 1 | 3.32%  |
| Q53HC3 | Solute carrier family 25 member 3 isoform b variant (Fragment)         | 1 | 1 | 3.32%  |
| Q00325 | Phosphate carrier protein, mitochondrial (Phosphate carrier) SLC25A3 P | 1 | 1 | 3.31%  |

|        |                                                           |           |   |   |        |
|--------|-----------------------------------------------------------|-----------|---|---|--------|
| Q8NCF7 | cDNA FLJ90278 fis, clone NT2RP1000325, highly similar to  |           | 1 | 1 | 3.32%  |
| F8VVM2 | Phosphate carrier protein, mitochondrial                  | SLC25A3   | 1 | 1 | 3.70%  |
| B3KX72 | cDNA FLJ44920 fis, clone BRAMY3011501, highly similar to  |           | 1 | 1 | 0.93%  |
| Q96BA7 | HNRPU protein                                             |           | 1 | 1 | 0.97%  |
| B4DLR3 | cDNA FLJ54020, highly similar to Heterogeneous nuclear r  |           | 1 | 1 | 0.89%  |
| Q00839 | Heterogeneous nuclear ribonucleoprotein U (HNRNPU H       |           | 1 | 1 | 0.85%  |
| Q7Z4Q5 | Heterogeneous nuclear ribonucleoprotein U (HNRPU hC       |           | 1 | 1 | 1.36%  |
| B4DJW3 | Renalase (cDNA FLJ55083, highly similar to Re RNLS        |           | 1 | 1 | 3.02%  |
| Q5VYX0 | Renalase (EC 1.6.3.5) (Monoamine oxidase-C) RNLS C100     |           | 1 | 1 | 2.05%  |
| B4DL14 | ATP synthase subunit gamma                                | ATP5C1    | 1 | 1 | 4.00%  |
| Q8TAS0 | ATP synthase subunit gamma (Fragment)                     |           | 1 | 1 | 3.44%  |
| P36542 | ATP synthase subunit gamma, mitochondrial (ATP5C1 AT      |           | 1 | 1 | 3.36%  |
| B4DRF4 | Very-long-chain (3R)-3-hydroxyacyl-[acyl-carri            | PTPLAD1   | 1 | 1 | 4.56%  |
| H3BRL8 | Very-long-chain (3R)-3-hydroxyacyl-[acyl-carri            | PTPLAD1   | 1 | 1 | 5.71%  |
| Q9P035 | Very-long-chain (3R)-3-hydroxyacyl-CoA dehydr             | PTPLAD1 B | 1 | 1 | 3.87%  |
| H3BPZ1 | Very-long-chain (3R)-3-hydroxyacyl-[acyl-carri            | PTPLAD1   | 1 | 1 | 4.15%  |
| H3BS72 | Very-long-chain (3R)-3-hydroxyacyl-[acyl-carri            | PTPLAD1   | 1 | 1 | 3.50%  |
| H3BMZ1 | Very-long-chain (3R)-3-hydroxyacyl-[acyl-carri            | PTPLAD1   | 1 | 1 | 10.07% |
| B4DRX3 | 60S ribosomal protein L6                                  |           | 1 | 1 | 3.08%  |
| Q8TBK5 | 60S ribosomal protein L6                                  | RPL6      | 1 | 1 | 2.43%  |
| Q9HBB3 | 60S ribosomal protein L6                                  |           | 1 | 1 | 2.42%  |
| Q8N5Z7 | 60S ribosomal protein L6                                  | RPL6      | 1 | 1 | 2.43%  |
| Q02878 | 60S ribosomal protein L6 (Neoplasm-related p              | RPL6 TXRE | 1 | 1 | 2.43%  |
| B2R4K7 | 60S ribosomal protein L6                                  |           | 1 | 1 | 2.43%  |
| B4DUG4 | cDNA FLJ51308                                             |           | 1 | 1 | 11.50% |
| K7ELG9 | Protein LSM12 homolog                                     | LSM12     | 1 | 1 | 5.65%  |
| Q3MHD2 | Protein LSM12 homolog                                     | LSM12     | 1 | 1 | 6.67%  |
| B4E0Q6 | cDNA FLJ60209, highly similar to Transcriptional represso |           | 1 | 1 | 4.20%  |
| F5H7D9 | Transcriptional repressor p66-alpha                       | GATAD2A   | 1 | 1 | 4.20%  |
| B4DKZ7 | Transcriptional repressor p66-alpha (cDNA FLJ             | GATAD2A   | 1 | 1 | 2.52%  |
| B3KSZ4 | cDNA FLJ37346 fis, clone BRAMY2021310, highly similar to  |           | 1 | 1 | 1.85%  |
| Q86YP4 | Transcriptional repressor p66-alpha (Hp66alp              | GATAD2A   | 1 | 1 | 1.74%  |
| Q8WXI9 | Transcriptional repressor p66-beta (GATA zinc             | GATAD2B k | 1 | 1 | 1.85%  |
| B4E0V7 | cDNA FLJ51709, highly similar to Myotubularin-related pr  |           | 1 | 1 | 1.13%  |
| B4E119 | cDNA FLJ58870, highly similar to Homo sapiens NOL1/NO     |           | 1 | 1 | 8.64%  |
| B5BTY4 | ATP-dependent RNA helicase DDX3X                          | DDX3X     | 1 | 1 | 1.51%  |
| B4E132 | cDNA FLJ53122, highly similar to ATP-dependent RNA heli   |           | 1 | 1 | 2.46%  |
| O15523 | Heterogeneous nuclear ribonucleoprotein R (HNRNPR HI      |           | 1 | 1 | 1.52%  |
| B4DXX7 | Uncharacterized protein (cDNA FLJ50912, highl             | DDX3Y     | 1 | 1 | 1.52%  |
| B4DLU5 | cDNA FLJ60675, highly similar to ATP-dependent RNA heli   |           | 1 | 1 | 1.88%  |
| Q59GX6 | DEAD/H (Asp-Glu-Ala-Asp/His) box polypeptide 3 variant    |           | 1 | 1 | 1.48%  |
| Q5S4N1 | Putative uncharacterized protein (Fragment)               |           | 1 | 1 | 2.76%  |
| O00571 | Myosin regulatory light chain 12B (MLC-2A) (M             | MYL12B MI | 1 | 1 | 1.51%  |
| B7Z5Y3 | cDNA FLJ52112, highly similar to C-myc promoter-binding   |           | 1 | 1 | 1.67%  |
| A8K2M7 | cDNA FLJ77039, highly similar to Homo sapiens c-myc pro   |           | 1 | 1 | 1.19%  |
| Q7Z401 | C-myc promoter-binding protein (DENN doma                 | DENND4A I | 1 | 1 | 0.59%  |
| H3BTW5 | C-myc promoter-binding protein (Fragment)                 | DENND4A   | 1 | 1 | 1.10%  |
| Q05C90 | DENND4A protein (Fragment)                                | DENND4A   | 1 | 1 | 1.18%  |
| B7ZM99 | MTHFD1L protein (Methylenetetrahydrofolat                 | MTHFD1L   | 1 | 1 | 0.92%  |
| H0Y327 | Monofunctional C1-tetrahydrofolate synthase               | MTHFD1L   | 1 | 1 | 2.71%  |

|        |                                                                |            |   |   |        |
|--------|----------------------------------------------------------------|------------|---|---|--------|
| Q5JYA5 | Monofunctional C1-tetrahydrofolate synthase                    | MTHFD1L    | 1 | 1 | 7.50%  |
| C9JAK5 | ADP-ribosylation factor 4                                      | ARF4       | 1 | 1 | 6.54%  |
| P18085 | ADP-ribosylation factor 4                                      | ARF4 ARF2  | 1 | 1 | 5.56%  |
| C9JPM4 | ADP-ribosylation factor 4 (Fragment)                           | ARF4       | 1 | 1 | 7.87%  |
| C9JU56 | 60S ribosomal protein L31 (Fragment)                           | RPL31      | 1 | 1 | 7.83%  |
| H7C2W9 | 60S ribosomal protein L31 (Fragment)                           | RPL31      | 1 | 1 | 8.33%  |
| B2R4C1 | cDNA, FLJ92036, highly similar to Homo sapiens ribosome        |            | 1 | 1 | 7.20%  |
| B7Z4C8 | 60S ribosomal protein L31 (cDNA FLJ57527, hi                   | RPL31      | 1 | 1 | 6.92%  |
| P62899 | 60S ribosomal protein L31                                      | RPL31      | 1 | 1 | 7.20%  |
| B8ZZK4 | 60S ribosomal protein L31                                      | RPL31      | 1 | 1 | 11.39% |
| B7Z4E3 | 60S ribosomal protein L31 (cDNA FLJ58908, hi                   | RPL31      | 1 | 1 | 7.50%  |
| C9JWC4 | Holliday junction recognition protein (Fragment)               | HJURP      | 1 | 1 | 1.75%  |
| Q8NCD3 | Holliday junction recognition protein (14-3-3- $\alpha$ )      | HJURP FAK  | 1 | 1 | 1.34%  |
| H7C3V8 | Holliday junction recognition protein (Fragment)               | HJURP      | 1 | 1 | 3.73%  |
| E1P5S2 | RNA-binding protein 39 (RNA-binding region)                    | RBM39 RNI  | 1 | 1 | 4.56%  |
| G3XAC6 | RNA-binding protein 39 (RNA-binding region)                    | RBM39 RNI  | 1 | 1 | 4.02%  |
| Q6N037 | Putative uncharacterized protein DKFZp686A1DKFZp686A           |            | 1 | 1 | 4.63%  |
| Q14498 | RNA-binding protein 39 (Hepatocellular carcinoma)              | RBM39 HCC  | 1 | 1 | 3.21%  |
| B4DLM0 | cDNA FLJ60296, highly similar to RNA-binding region-cont       |            | 1 | 1 | 3.38%  |
| B3KWX7 | cDNA FLJ44170 fis, clone THYMU2035319, highly similar t        |            | 1 | 1 | 3.36%  |
| Q68DD9 | Putative uncharacterized protein DKFZp781CC DKFZp781C          |            | 1 | 1 | 3.31%  |
| B4DRA0 | cDNA FLJ58459, highly similar to RNA-binding region-cont       |            | 1 | 1 | 3.39%  |
| Q6MZY7 | Putative uncharacterized protein DKFZp686C1DKFZp686C           |            | 1 | 1 | 4.56%  |
| B7Z4L7 | cDNA FLJ59035, highly similar to RNA-binding region-cont       |            | 1 | 1 | 5.04%  |
| B4E1M7 | cDNA FLJ58465, highly similar to RNA-binding region-cont       |            | 1 | 1 | 3.26%  |
| H0Y4X3 | RNA-binding protein 39 (Fragment)                              | RBM39      | 1 | 1 | 5.04%  |
| E5RGB3 | Tripartite motif-containing protein 35                         | TRIM35     | 1 | 1 | 2.63%  |
| Q9UPQ4 | Tripartite motif-containing protein 35 (Hemophilus influenzae) | TRIM35 HL  | 1 | 1 | 1.42%  |
| E5RJH3 | 60S ribosomal protein L30                                      | RPL30      | 1 | 1 | 10.71% |
| E5RI99 | 60S ribosomal protein L30 (Fragment)                           | RPL30      | 1 | 1 | 5.26%  |
| O95757 | Double-stranded RNA-binding protein Staufer                    | STAU1 STA  | 1 | 1 | 0.72%  |
| Q53ZP9 | Heat shock protein apg-1                                       |            | 1 | 1 | 0.72%  |
| B4DZR0 | cDNA FLJ55529, highly similar to Heat shock 70 kDa prote       |            | 1 | 1 | 0.69%  |
| E9PDE8 | Heat shock 70 kDa protein 4L                                   | HSPA4L     | 1 | 1 | 0.74%  |
| P62888 | 60S ribosomal protein L30                                      | RPL30      | 1 | 1 | 5.22%  |
| E7ES43 | Heat shock 70 kDa protein 4L                                   | HSPA4L     | 1 | 1 | 0.69%  |
| B4DXT2 | cDNA FLJ59635, highly similar to Heat shock 70 kDa prote       |            | 1 | 1 | 0.74%  |
| E7EQV9 | Ribosomal protein L15 (Fragment)                               | RPL15      | 1 | 1 | 5.17%  |
| B4DLP4 | Ribosomal protein L15                                          |            | 1 | 1 | 5.49%  |
| P61313 | 60S ribosomal protein L15                                      | RPL15 EC45 | 1 | 1 | 4.41%  |
| E7EX53 | Ribosomal protein L15 (Fragment)                               | RPL15      | 1 | 1 | 6.77%  |
| E7ESJ3 | Uncharacterized protein                                        | ANKRD26    | 1 | 1 | 0.46%  |
| A1L497 | ANKRD26 protein                                                | ANKRD26    | 1 | 1 | 0.46%  |
| Q9UPS8 | Ankyrin repeat domain-containing protein 26                    | ANKRD26 k  | 1 | 1 | 0.47%  |
| A8K6L7 | cDNA FLJ78668, highly similar to Homo sapiens deleted in       |            | 1 | 1 | 0.92%  |
| A8K119 | cDNA FLJ76742, highly similar to Homo sapiens deleted in       |            | 1 | 1 | 1.28%  |
| Q96QB1 | Rho GTPase-activating protein 7 (Deleted in lipodystrophy)     | ARHC       | 1 | 1 | 0.92%  |
| E9PG32 | Dynein heavy chain 12, axonemal (Fragment)                     | DNAH12     | 1 | 1 | 0.22%  |
| Q6ZR08 | Dynein heavy chain 12, axonemal (Axonemal)                     | DNAH12 DI  | 1 | 1 | 0.16%  |
| E9PI69 | Protein unc-93 homolog B1                                      | UNC93B1    | 1 | 1 | 11.11% |



|        |                                                                           |           |   |   |        |
|--------|---------------------------------------------------------------------------|-----------|---|---|--------|
| E9PKU4 | 60S ribosomal protein L8 (Fragment)                                       | RPL8      | 1 | 1 | 4.68%  |
| E9PKZ0 | 60S ribosomal protein L8 (Fragment)                                       | RPL8      | 1 | 1 | 5.37%  |
| P62917 | 60S ribosomal protein L8                                                  | RPL8      | 1 | 1 | 4.28%  |
| E9PP36 | 60S ribosomal protein L8                                                  | RPL8      | 1 | 1 | 7.43%  |
| F2Z388 | 60S ribosomal protein L35                                                 | RPL35     | 1 | 1 | 10.42% |
| P42766 | 60S ribosomal protein L35                                                 | RPL35     | 1 | 1 | 8.13%  |
| F4MHB8 | Ubiquitously transcribed tetratricopeptide repeat                         | UTY       | 1 | 1 | 3.29%  |
| F4MHC9 | Ubiquitously transcribed tetratricopeptide repeat                         | UTY       | 1 | 1 | 1.13%  |
| F4MH54 | Ubiquitously transcribed tetratricopeptide repeat                         | UTY       | 1 | 1 | 0.64%  |
| F4MH35 | Ubiquitously transcribed tetratricopeptide repeat                         | UTY       | 1 | 1 | 0.48%  |
| F5GZQ4 | L-lactate dehydrogenase A chain (Fragment)                                | LDHA      | 1 | 1 | 20.83% |
| F5GXY2 | L-lactate dehydrogenase A chain (Fragment)                                | LDHA      | 1 | 1 | 9.55%  |
| F5GXH2 | L-lactate dehydrogenase A chain (Fragment)                                | LDHA      | 1 | 1 | 13.16% |
| F5H6W8 | L-lactate dehydrogenase A chain                                           | LDHA      | 1 | 1 | 15.96% |
| F5GYU2 | L-lactate dehydrogenase A chain (Fragment)                                | LDHA      | 1 | 1 | 10.42% |
| F5H5J4 | L-lactate dehydrogenase A chain                                           | LDHA      | 1 | 1 | 16.85% |
| F5H012 | E3 ubiquitin-protein ligase TRIM21                                        | TRIM21    | 1 | 1 | 1.89%  |
| P19474 | E3 ubiquitin-protein ligase TRIM21 (EC 6.3.2.-)                           | TRIM21 RN | 1 | 1 | 1.89%  |
| F5H1F7 | Lysine-specific demethylase 5A                                            | KDM5A     | 1 | 1 | 0.55%  |
| P29375 | Lysine-specific demethylase 5A (EC 1.14.11.-)                             | KDM5A JAF | 1 | 1 | 0.53%  |
| B4DVM9 | cDNA FLJ50247, highly similar to Jumonji/ARID domain-containing protein 1 |           | 1 | 1 | 0.86%  |
| F8VRV5 | Dynein light chain 1, cytoplasmic                                         | DYNLL1    | 1 | 1 | 7.46%  |
| F8VXI7 | Dynein light chain 1, cytoplasmic (Fragment)                              | DYNLL1    | 1 | 1 | 11.90% |
| Q96FJ2 | Dynein light chain 2, cytoplasmic (8 kDa dynein)                          | DYNLL2 DL | 1 | 1 | 5.62%  |
| Q6FGH9 | DNCL1 protein (Dynein, light chain, LC8-type 1)                           | DNCL1 DYN | 1 | 1 | 5.62%  |
| F8VXL2 | Dynein light chain 1, cytoplasmic                                         | DYNLL1    | 1 | 1 | 10.64% |
| A8K9V3 | cDNA FLJ76469, highly similar to Homo sapiens tektin 1 (Tektin-1)         |           | 1 | 1 | 1.20%  |
| F5GZX2 | Tektin-1                                                                  | TEKT1     | 1 | 1 | 1.84%  |
| Q969V4 | Tektin-1                                                                  | TEKT1     | 1 | 1 | 1.20%  |
| B4E2M7 | cDNA FLJ52835, highly similar to Tektin-1                                 |           | 1 | 1 | 1.84%  |
| P63167 | Dynein light chain 1, cytoplasmic (8 kDa dynein)                          | DYNLL1 DL | 1 | 1 | 5.62%  |
| F8VWS0 | 60S acidic ribosomal protein P0                                           | RPLP0     | 1 | 1 | 2.14%  |
| F8VW21 | 60S acidic ribosomal protein P0 (Fragment)                                | RPLP0     | 1 | 1 | 2.46%  |
| Q53HK9 | Ribosomal protein P0 variant (Fragment)                                   |           | 1 | 1 | 1.89%  |
| A8K4Z4 | cDNA FLJ75549, highly similar to Homo sapiens ribosomal protein P0        |           | 1 | 1 | 1.89%  |
| Q6NSF2 | RPLP0 protein                                                             | RPLP0     | 1 | 1 | 2.36%  |
| F8VS58 | 60S acidic ribosomal protein P0 (Fragment)                                | RPLP0     | 1 | 1 | 4.96%  |
| F8VZS0 | 60S acidic ribosomal protein P0 (Fragment)                                | RPLP0     | 1 | 1 | 2.44%  |
| G3V210 | 60S acidic ribosomal protein P0 (Ribosomal protein P0)                    | RPLP0 hCG | 1 | 1 | 3.61%  |
| F8VQY6 | 60S acidic ribosomal protein P0                                           | RPLP0     | 1 | 1 | 4.23%  |
| P05388 | Myosin light chain 1/3, skeletal muscle isoform                           | MYL1      | 1 | 1 | 1.89%  |
| Q3B7A4 | 60S acidic ribosomal protein P0 (RPLP0 protein)                           | RPLP0     | 1 | 1 | 2.35%  |
| F8VRK7 | 60S acidic ribosomal protein P0                                           | RPLP0     | 1 | 1 | 3.85%  |
| F8VU65 | 60S acidic ribosomal protein P0 (Fragment)                                | RPLP0     | 1 | 1 | 2.43%  |
| F8VYN4 | 60S acidic ribosomal protein P0                                           | RPLP0     | 1 | 1 | 10.53% |
| Q53HW2 | Ribosomal protein P0 variant (Fragment)                                   |           | 1 | 1 | 1.89%  |
| B4E3D5 | cDNA FLJ51469, highly similar to 60S acidic ribosomal protein P0          |           | 1 | 1 | 2.26%  |
| Q8NHW5 | 60S acidic ribosomal protein P0-like                                      | RPLPOP6   | 1 | 1 | 1.89%  |
| H0UID3 | Adaptor-related protein complex 2, beta 1 subunit                         | AP2B1 hCG | 1 | 1 | 1.37%  |
| H0UID4 | Adaptor-related protein complex 2, beta 1 subunit                         | AP2B1 hCG | 1 | 1 | 1.39%  |

|        |                                                            |           |       |   |   |        |
|--------|------------------------------------------------------------|-----------|-------|---|---|--------|
| P63010 | AP-2 complex subunit beta (AP105B) (Adapter                | AP2B1     | ADT   | 1 | 1 | 1.39%  |
| H0UID5 | Adaptor-related protein complex 2, beta 1 su               | AP2B1     | hCG   | 1 | 1 | 1.39%  |
| A8K916 | cdDNA FLJ78481, highly similar to Homo sapiens adaptor-r   |           |       | 1 | 1 | 1.37%  |
| Q68DI0 | Putative uncharacterized protein DKFZp781KC                | DKFZp781K |       | 1 | 1 | 1.37%  |
| Q96EL6 | Putative uncharacterized protein (Fragment)                |           |       | 1 | 1 | 2.34%  |
| K7EJT8 | AP-2 complex subunit beta                                  | AP2B1     |       | 1 | 1 | 1.42%  |
| B4DWG4 | cdDNA FLJ53223, highly similar to Adapter-relatedprotein c |           |       | 1 | 1 | 1.42%  |
| B4DIL5 | cdDNA FLJ54516, highly similar to Adapter-relatedprotein c |           |       | 1 | 1 | 3.82%  |
| B4E261 | cdDNA FLJ55646, highly similar to Adapter-relatedprotein c |           |       | 1 | 1 | 1.89%  |
| H0YC33 | La-related protein 1 (Fragment)                            | LARP1     |       | 1 | 1 | 7.10%  |
| E5RH50 | La-related protein 1 (Fragment)                            | LARP1     |       | 1 | 1 | 2.13%  |
| Q6PKG0 | La-related protein 1 (La ribonucleoprotein dor             | LARP1     | KIAA  | 1 | 1 | 1.19%  |
| H3BPX2 | Obscurin                                                   | OBSCN     |       | 1 | 1 | 0.12%  |
| Q5VST9 | Obscurin (EC 2.7.11.1) (Obscurin-RhoGEF) (Ob               | OBSCN     | KIAA  | 1 | 1 | 0.14%  |
| H3BSR6 | Fractalkine                                                | CX3CL1    |       | 1 | 1 | 1.74%  |
| Q6I9S9 | CX3CL1 protein                                             | CX3CL1    |       | 1 | 1 | 1.76%  |
| P78423 | Fractalkine (C-X3-C motif chemokine 1) (CX3C               | CX3CL1    | FKP   | 1 | 1 | 1.76%  |
| A0N0N7 | Chemokine (C-X3-C motif) ligand 1 (cdDNA, FLJ              | CX3CL1    | hCG   | 1 | 1 | 1.76%  |
| J3QRA1 | Fractalkine                                                | CX3CL1    |       | 1 | 1 | 1.95%  |
| Q59GS2 | Chemokine (C-X3-C motif) ligand 1 variant (Fragment)       |           |       | 1 | 1 | 1.84%  |
| Q53FD8 | Chemokine (C-X3-C motif) ligand 1 variant (Fragment)       |           |       | 1 | 1 | 4.12%  |
| Q53H89 | Chemokine (C-X3-C motif) ligand 1 variant (Fragment)       |           |       | 1 | 1 | 1.76%  |
| H7C5K0 | Helicase-like transcription factor (Fragment)              | HLTF      |       | 1 | 1 | 2.12%  |
| Q59GQ7 | SWI/SNF-related matrix-associated actin-dependent regu     |           |       | 1 | 1 | 0.91%  |
| Q14527 | Helicase-like transcription factor (EC 3.6.4.-) (H         | HLTF      | HIP11 | 1 | 1 | 0.89%  |
| A8K5B6 | cdDNA FLJ76830, highly similar to Homo sapiens SWI/SNF i   |           |       | 1 | 1 | 0.89%  |
| I0B0K4 | Truncated profilaggrin                                     | FLG       |       | 1 | 1 | 0.63%  |
| I0B0K7 | Truncated profilaggrin                                     | FLG       |       | 1 | 1 | 0.26%  |
| I0B0K8 | Truncated profilaggrin                                     | FLG       |       | 1 | 1 | 0.17%  |
| I0B0K6 | Truncated profilaggrin                                     | FLG       |       | 1 | 1 | 0.27%  |
| I0B0K3 | Truncated profilaggrin                                     | FLG       |       | 1 | 1 | 0.85%  |
| I0B0K5 | Truncated profilaggrin                                     | FLG       |       | 1 | 1 | 0.29%  |
| P20930 | Filaggrin                                                  | FLG       |       | 1 | 1 | 0.17%  |
| I3L3P7 | 40S ribosomal protein S15a                                 | RPS15A    |       | 1 | 1 | 9.00%  |
| H3BT37 | 40S ribosomal protein S15a                                 | RPS15A    |       | 1 | 1 | 18.00% |
| A8K7H3 | cdDNA FLJ77670, highly similar to Homo sapiens ribosomal   |           |       | 1 | 1 | 6.92%  |
| H3BV27 | 40S ribosomal protein S15a                                 | RPS15A    |       | 1 | 1 | 18.37% |
| B2R4W8 | HCG1994130, isoform CRA_a (cdDNA FLJ30359                  | hCG_19941 |       | 1 | 1 | 6.92%  |
| I3L246 | 40S ribosomal protein S15a                                 | RPS15A    |       | 1 | 1 | 8.11%  |
| P62244 | 40S ribosomal protein S15a                                 | RPS15A    | OK    | 1 | 1 | 6.92%  |
| H3BN98 | Uncharacterized protein (Fragment)                         |           |       | 1 | 1 | 3.80%  |
| I3L303 | 40S ribosomal protein S15a                                 | RPS15A    |       | 1 | 1 | 17.31% |
| I3L3Q7 | Complement component 1 Q subcomponent-                     | C1QBP     |       | 1 | 1 | 7.34%  |
| A8K651 | cdDNA FLJ75700, highly similar to Homo sapiens complem     |           |       | 1 | 1 | 4.61%  |
| Q07021 | Complement component 1 Q subcomponent-                     | C1QBP     | GC1   | 1 | 1 | 4.61%  |
| I3L3B0 | Complement component 1 Q subcomponent-                     | C1QBP     | hCC   | 1 | 1 | 7.30%  |
| J3KPG5 | Bromodomain adjacent to zinc finger domain                 | BAZ2A     |       | 1 | 1 | 0.32%  |
| F8VU39 | Bromodomain adjacent to zinc finger domain                 | BAZ2A     |       | 1 | 1 | 0.32%  |
| H0YI13 | Bromodomain adjacent to zinc finger domain                 | BAZ2A     |       | 1 | 1 | 2.93%  |
| Q9UIF9 | Bromodomain adjacent to zinc finger domain                 | BAZ2A     | KIAA  | 1 | 1 | 0.31%  |

|        |                                                                         |             |   |   |        |
|--------|-------------------------------------------------------------------------|-------------|---|---|--------|
| J3QK86 | Bromodomain adjacent to zinc finger domain BAZ2A hCG                    |             | 1 | 1 | 0.32%  |
| J3QL05 | Serine/arginine-rich-splicing factor 2 (FragmerSRSF2                    |             | 1 | 1 | 6.15%  |
| Q53FN0 | Splicing factor, arginine/serine-rich 2 variant (Fragment)              |             | 1 | 1 | 3.62%  |
| J3KP15 | Serine/arginine-rich-splicing factor 2 (FragmerSRSF2                    |             | 1 | 1 | 5.97%  |
| Q9BRL6 | Serine/arginine-rich splicing factor 8 (Pre-mRN <sup>1</sup> SRSF8 SFRS |             | 1 | 1 | 2.84%  |
| B3KX15 | cDNA FLJ44468 fis, clone UTERU2026025, moderately sim                   |             | 1 | 1 | 6.56%  |
| B3KUY1 | Splicing factor, arginine/serine-rich 2, isoform SFRS2 hCG_             |             | 1 | 1 | 3.83%  |
| Q01130 | Serine/arginine-rich splicing factor 2 (Protein  SRSF2 SFRS             |             | 1 | 1 | 3.62%  |
| Q8N220 | Splicing factor, arginine/serine-rich 2, isoform SFRS2 hCG_             |             | 1 | 1 | 4.30%  |
| B3KVY2 | cDNA FLJ41718 fis, clone HLUNG2013097, highly similar to                |             | 1 | 1 | 4.10%  |
| Q6NXQ0 | SFRS2 protein                                                           | SFRS2       | 1 | 1 | 4.47%  |
| B3KUF7 | cDNA FLJ39750 fis, clone SMINT2017736, moderately sim                   |             | 1 | 1 | 4.02%  |
| Q8NAK9 | cDNA FLJ35170 fis, clone PLACE6012942, highly similar to                |             | 1 | 1 | 3.98%  |
| B4DN89 | Serine/arginine-rich-splicing factor 2 (Splicing SFRS2 SRSF             |             | 1 | 1 | 3.83%  |
| K7EJT5 | 60S ribosomal protein L22 (Fragment)                                    | RPL22       | 1 | 1 | 23.40% |
| K7EP65 | DNA ligase 3 (Fragment)                                                 | LIG3        | 1 | 1 | 22.92% |
| K7EKS7 | 60S ribosomal protein L22                                               | RPL22       | 1 | 1 | 20.75% |
| P35268 | 60S ribosomal protein L22 (EBER-associated p                            | RPL22       | 1 | 1 | 8.59%  |
| K7EMH1 | 60S ribosomal protein L22 (Fragment)                                    | RPL22       | 1 | 1 | 12.36% |
| K7ELC4 | 60S ribosomal protein L22 (Fragment)                                    | RPL22       | 1 | 1 | 13.92% |
| K7ERI7 | 60S ribosomal protein L23a (Fragment)                                   | RPL23A      | 1 | 1 | 11.58% |
| Q7Z4W8 | Heparin-binding protein HBp15                                           |             | 1 | 1 | 8.59%  |
| K7EKI0 | Envoplakin                                                              | EVPL        | 1 | 1 | 0.29%  |
| Q7RTP6 | Protein-methionine sulfoxide oxidase MICAL3 MICAL3 KIA                  |             | 1 | 1 | 0.30%  |
| Q92817 | Envoplakin (210 kDa cornified envelope precu                            | EVPL        | 1 | 1 | 0.30%  |
| B7ZLH8 | EVPL protein                                                            | EVPL        | 1 | 1 | 0.29%  |
| J3QQT0 | Protein-methionine sulfoxide oxidase MICAL3 MICAL3                      |             | 1 | 1 | 2.22%  |
| A8K0E1 | cDNA FLJ78351                                                           |             | 1 | 1 | 5.08%  |
| Q8N4N8 | Kinesin-like protein KIF2B                                              | KIF2B       | 1 | 1 | 0.89%  |
| B4DY48 | cDNA FLJ53902, highly similar to Homo sapiens kinesin fa                |             | 1 | 1 | 1.07%  |
| L0R809 | Alternative protein EDARADD (EDAR-associatε                             | EDARADD f   | 1 | 1 | 12.50% |
| M0QY97 | Inactive serine/threonine-protein kinase VRK <sup>2</sup> VRK3          |             | 1 | 1 | 0.66%  |
| Q9UPT8 | Zinc finger CCCH domain-containing protein 4 ZC3H4 C19i                 |             | 1 | 1 | 0.46%  |
| M0QYR6 | Urokinase plasminogen activator surface rece                            | PLAUR       | 1 | 1 | 3.98%  |
| M0QYS6 | 40S ribosomal protein S11                                               | RPS11       | 1 | 1 | 6.77%  |
| M0R383 | Heterogeneous nuclear ribonucleoprotein U-                              | HNRNPUL1    | 1 | 1 | 5.84%  |
| M0R1I2 | Urokinase plasminogen activator surface rece                            | PLAUR       | 1 | 1 | 3.15%  |
| M0R0Y4 | Urokinase plasminogen activator surface rece                            | PLAUR       | 1 | 1 | 4.86%  |
| Q03405 | Urokinase plasminogen activator surface rece                            | PLAUR MO    | 1 | 1 | 2.69%  |
| Q9UPI5 | U-plasminogen activator receptor form 2-hun                             | PLAUR       | 1 | 1 | 3.59%  |
| M0R0H5 | Urokinase plasminogen activator surface rece                            | PLAUR       | 1 | 1 | 5.88%  |
| M0R2E9 | Urokinase plasminogen activator surface rece                            | PLAUR       | 1 | 1 | 5.92%  |
| O60249 | Heterogeneous nuclear ribonucleoprotein Q (                             | SYNCRIP HI  | 1 | 1 | 7.69%  |
| Q8NI62 | Ribosomal protein S2                                                    | OK/KNS-cl.i | 1 | 1 | 7.59%  |
| Q8J014 | Ribosomal protein S2                                                    | rps2        | 1 | 1 | 2.58%  |
| Q8N5L9 | Ribosomal protein S2                                                    | RPS2        | 1 | 1 | 2.05%  |
| Q9BSW5 | RPS2 protein (Fragment)                                                 | RPS2        | 1 | 1 | 6.19%  |
| P15880 | 40S ribosomal protein S2 (40S ribosomal prot                            | RPS2 RPS4   | 1 | 1 | 2.05%  |
| Q6ZNN8 | CDNA FLJ27420 fis, clone WMC07143                                       |             | 1 | 1 | 3.95%  |
| Q6IPX5 | Ribosomal protein S2                                                    | RPS2        | 1 | 1 | 2.05%  |

|        |                                                                                           |                 |   |   |        |
|--------|-------------------------------------------------------------------------------------------|-----------------|---|---|--------|
| A4D0Y7 | Similar to 40S ribosomal protein S2                                                       | LOC392781       | 1 | 1 | 3.13%  |
| H0YEN5 | 40S ribosomal protein S2 (Fragment)                                                       | RPS2            | 1 | 1 | 3.08%  |
| Q3KQT6 | Ribosomal protein S2                                                                      | RPS2            | 1 | 1 | 2.05%  |
| E9PQD7 | 40S ribosomal protein S2                                                                  | RPS2            | 1 | 1 | 2.55%  |
| Q05CK9 | SYNCRIP protein (Fragment)                                                                | SYNCRIP         | 1 | 1 | 1.77%  |
| Q6MZS5 | Putative uncharacterized protein DKFZp686A1DKFZp686A                                      |                 | 1 | 1 | 1.31%  |
| Q0VGD6 | HNRPR protein (Fragment)                                                                  | HNRPR           | 1 | 1 | 1.32%  |
| B2R8Z8 | cDNA, FLJ94136, highly similar to Homo sapiens synaptotagmin II                           |                 | 1 | 1 | 1.28%  |
| B4DMB1 | cDNA FLJ53358, highly similar to Heterogeneous nuclear ribonucleoprotein A3               |                 | 1 | 1 | 1.34%  |
| B2R7W4 | cDNA, FLJ93632, highly similar to Homo sapiens heterogeneous nuclear ribonucleoprotein A3 |                 | 1 | 1 | 1.26%  |
| O60506 | Heterogeneous nuclear ribonucleoprotein C-like HNRNPCL1                                   |                 | 1 | 1 | 1.28%  |
| B7Z645 | Synaptotagmin binding, cytoplasmic RNA interacting protein SYNCRIP hCG                    |                 | 1 | 1 | 1.72%  |
| Q59GL1 | Synaptotagmin binding, cytoplasmic RNA interacting protein                                |                 | 1 | 1 | 1.50%  |
| O43390 | Ribosomal protein S2 (Fragment)                                                           |                 | 1 | 1 | 1.26%  |
| B4DT28 | Heterogeneous nuclear ribonucleoprotein R (HNRNP R) HNRNP R                               |                 | 1 | 1 | 1.62%  |
| Q53G71 | Calreticulin variant (Fragment)                                                           |                 | 1 | 1 | 2.22%  |
| P27797 | Calreticulin (CRP55) (Calregulin) (Endoplasmic reticulum chaperone)                       |                 | 1 | 1 | 2.16%  |
| B4DHR1 | cDNA FLJ53009, highly similar to Calreticulin                                             |                 | 1 | 1 | 4.25%  |
| Q59GD4 | Collagen, type V, alpha 3 preproprotein variant (Fragment)                                |                 | 1 | 1 | 0.42%  |
| H0YH38 | Probable phospholipid-transporting ATPase I                                               | KATP8B3         | 1 | 1 | 2.38%  |
| P25940 | Collagen alpha-3(V) chain                                                                 | COL5A3          | 1 | 1 | 0.40%  |
| Q5TEJ0 | Replication protein A 32 kDa subunit (Fragment)                                           | RPA2            | 1 | 1 | 7.38%  |
| B4DL94 | cDNA FLJ51490, highly similar to Replication protein A 32 kDa subunit                     |                 | 1 | 1 | 8.65%  |
| P15927 | Replication protein A 32 kDa subunit (RP-A p3)                                            | RPA2 REPA2      | 1 | 1 | 3.33%  |
| B4DQD9 | cDNA FLJ61154, highly similar to Replication protein A 32 kDa subunit                     |                 | 1 | 1 | 3.41%  |
| B2R7E8 | cDNA, FLJ93412, highly similar to Homo sapiens replication protein A 32 kDa subunit       |                 | 1 | 1 | 3.33%  |
| B4DUL2 | cDNA FLJ57152, highly similar to Replication protein A 32 kDa subunit                     |                 | 1 | 1 | 5.17%  |
| Q65ZQ3 | FBRNP                                                                                     | D10S102         | 1 | 1 | 3.72%  |
| B4DDB6 | Heterogeneous nuclear ribonucleoprotein A3, HNRPA3 hCG                                    |                 | 1 | 1 | 2.81%  |
| B4E3E6 | cDNA FLJ58832, highly similar to Heterogeneous nuclear ribonucleoprotein A3               |                 | 1 | 1 | 3.10%  |
| P51991 | Heterogeneous nuclear ribonucleoprotein A3                                                | HNRNPA3 HNRNPA3 | 1 | 1 | 2.65%  |
| Q6NSG7 | High-mobility group nucleosome binding domain HMGN1                                       |                 | 1 | 1 | 10.00% |
| D3DWY4 | HCG17955, isoform CRA_a                                                                   | hCG_17955       | 1 | 1 | 10.00% |
| P05114 | ADP/ATP translocase 2 (ADP,ATP carrier protein)                                           | SLC25A5 AL      | 1 | 1 | 10.00% |
| Q3B790 | High-mobility group nucleosome binding domain HMGN1                                       |                 | 1 | 1 | 10.00% |
| A6NL93 | Non-histone chromosomal protein HMG-14                                                    | HMGN1           | 1 | 1 | 11.11% |
| A6NEL0 | Non-histone chromosomal protein HMG-14                                                    | HMGN1           | 1 | 1 | 8.62%  |
| Q6NZ55 | 60S ribosomal protein L13                                                                 | RPL13           | 1 | 1 | 3.79%  |
| A8K4C8 | 60S ribosomal protein L13                                                                 | RPL13 hCG       | 1 | 1 | 3.79%  |
| P26373 | 60S ribosomal protein L13 (Breast basic core sequence)                                    | RPL13 BBC       | 1 | 1 | 3.79%  |
| J3QSB4 | 60S ribosomal protein L13 (Fragment)                                                      | RPL13           | 1 | 1 | 6.35%  |
| Q86W20 | Protease serine 1 (EC 3.4.21.4) (Fragment)                                                | PRSS1           | 1 | 1 | 15.48% |
| Q7Z5F4 | Protease serine 4 isoform B                                                               |                 | 1 | 1 | 4.98%  |
| Q8N2U3 | PRSS3 protein (Fragment)                                                                  | PRSS3           | 1 | 1 | 5.18%  |
| A1A508 | PRSS3 protein                                                                             | PRSS3           | 1 | 1 | 5.26%  |
| B1AN99 | Trypsin-3 (Fragment)                                                                      | PRSS3           | 1 | 1 | 7.30%  |
| P35030 | Trypsin-3 (EC 3.4.21.4) (Brain trypsinogen) (M)                                           | PRSS3 PRSS3     | 1 | 1 | 4.28%  |
| Q8IWR8 | Ribosomal protein L19 (Fragment)                                                          |                 | 1 | 1 | 5.20%  |
| J3QR09 | Ribosomal protein L19                                                                     | RPL19           | 1 | 1 | 4.66%  |
| Q53G49 | Ribosomal protein L19 (Fragment)                                                          |                 | 1 | 1 | 4.59%  |

|        |                                                        |           |   |   |        |
|--------|--------------------------------------------------------|-----------|---|---|--------|
| P84098 | 60S ribosomal protein L19                              | RPL19     | 1 | 1 | 4.59%  |
| J3KTE4 | Ribosomal protein L19                                  | RPL19 hCG | 1 | 1 | 4.64%  |
| Q8TA90 | Similar to Elongation factor 2b (Fragment)             |           | 1 | 1 | 1.35%  |
| E2DRY6 | Enolase (EC 4.2.1.11)                                  |           | 1 | 1 | 2.07%  |
| L0R849 | Zinc finger CCCH domain-containing protein 4 ZC3H4     |           | 1 | 1 | 1.80%  |
| Q9BV84 | SEC16A protein (Fragment)                              | SEC16A    | 1 | 1 | 3.76%  |
| A4QN18 | SEC16A protein (Fragment)                              | SEC16A    | 1 | 1 | 0.97%  |
| J3KNL6 | Protein transport protein Sec16A                       | SEC16A    | 1 | 1 | 0.81%  |
| A4QN19 | SEC16A protein (Fragment)                              | SEC16A    | 1 | 1 | 1.10%  |
| O15027 | ATP-dependent RNA helicase DDX3Y (EC 3.6.4 DDX3Y DBY   |           | 1 | 1 | 0.87%  |
| F1T011 | Protein transport protein Sec16A                       | SEC16A    | 1 | 1 | 0.81%  |
| Q9H2N7 | HCLA-iso                                               |           | 1 | 1 | 1.72%  |
| Q9HDB2 | Putative uncharacterized protein CATX-3 (Fraç CATX-3   |           | 1 | 1 | 21.88% |
| S6C4R6 | IgG L chain                                            |           | 1 | 1 | 3.80%  |
| S6B2A1 | IgG L chain                                            |           | 1 | 1 | 3.80%  |
| P83593 | Ig kappa chain V-IV region STH (Fragment)              |           | 1 | 1 | 6.42%  |
| P06313 | Ig kappa chain V-IV region B17                         |           | 1 | 1 | 5.26%  |
| P06314 | ATP synthase subunit beta, mitochondrial (EC ATP5B ATP |           | 1 | 1 | 5.22%  |
| P06312 | Ig kappa chain V-IV region JI                          |           | 1 | 1 | 5.79%  |
| P01625 | Keratin, type I cytoskeletal 14 (Cytokeratin-14 KRT14  |           | 1 | 1 | 6.14%  |

| MW       | PI   |
|----------|------|
| 141519.2 | 7.53 |
| 228996.4 | 5.44 |
| 230774.4 | 5.46 |
| 75491.15 | 7.56 |
| 231213.5 | 5.52 |
| 232038.4 | 5.52 |
| 227867.9 | 5.52 |
| 62615.29 | 5.09 |
| 50669.62 | 9.39 |
| 70362.19 | 5.78 |
| 51560.92 | 5.09 |
| 66349.66 | 5.11 |
| 73679.65 | 5.87 |
| 73852.85 | 6.04 |
| 72400.2  | 5.7  |
| 69951.77 | 6.01 |
| 69719.99 | 5.84 |
| 68326.44 | 5.77 |
| 234233.9 | 5.64 |
| 227336.6 | 5.42 |
| 65625.31 | 9.69 |
| 65747.44 | 9.65 |
| 70670.07 | 9.52 |
| 63032.54 | 6.34 |
| 76120.21 | 8.7  |
| 76120.21 | 8.7  |
| 113082.5 | 8.99 |
| 113084.4 | 8.99 |
| 72332.07 | 5.07 |
| 56974.49 | 9.16 |
| 113372.2 | 8.7  |
| 112712.6 | 8.79 |
| 32004.07 | 8.88 |
| 69784.13 | 6.27 |
| 64239.73 | 9.28 |
| 64282.76 | 9.32 |
| 69842.23 | 6.23 |
| 17259.45 | 9.59 |
| 17259.45 | 9.59 |
| 17358.59 | 9.73 |
| 49670.28 | 4.78 |
| 52047.79 | 4.79 |
| 47766.13 | 4.7  |
| 46565.92 | 4.83 |
| 49670.28 | 4.78 |
| 51267.25 | 4.98 |
| 70782.06 | 9.31 |
| 67970.07 | 9.47 |

|          |       |
|----------|-------|
| 72359.8  | 9.38  |
| 28993.5  | 5.29  |
| 29096.29 | 9.74  |
| 29096.29 | 9.74  |
| 25566.54 | 9.69  |
| 29110.32 | 9.74  |
| 29082.27 | 9.74  |
| 25796.36 | 8.75  |
| 68137.42 | 6.92  |
| 22591.14 | 10.66 |
| 13161.26 | 10.45 |
| 16627.55 | 11.06 |
| 18563.87 | 10.81 |
| 18400.42 | 10.34 |
| 74222.44 | 5.95  |
| 140956.9 | 6.41  |
| 629094.1 | 5.8   |
| 82431.21 | 6.8   |
| 69554.9  | 7.62  |
| 82431.21 | 6.8   |
| 112905.7 | 9.17  |
| 106016.7 | 9.27  |
| 112905.7 | 9.17  |
| 20939.71 | 6.09  |
| 61696.41 | 9.33  |
| 82321.62 | 8.8   |
| 20456.67 | 4.62  |
| 19792.94 | 4.72  |
| 19778.95 | 4.71  |
| 19793.92 | 4.67  |
| 13997.33 | 10.32 |
| 18430.51 | 10.31 |
| 56200.33 | 6.63  |
| 48944.3  | 6.47  |
| 56101.2  | 6.5   |
| 24857.35 | 7.59  |
| 13508.51 | 10.58 |
| 13552.57 | 10.58 |
| 13162.96 | 9.99  |
| 49752.41 | 4.82  |
| 49839.49 | 4.83  |
| 49807.44 | 4.76  |
| 44601.78 | 4.84  |
| 49830.48 | 4.79  |
| 75022.25 | 9.7   |
| 22782.23 | 5.98  |
| 32574.66 | 4.64  |
| 29977.79 | 4.61  |
| 82703.57 | 5.55  |
| 64242.58 | 5.7   |

|          |       |
|----------|-------|
| 22349.61 | 11.02 |
| 21364.47 | 10.94 |
| 21864.98 | 11.03 |
| 21878.97 | 11.03 |
| 21864.98 | 11.03 |
| 21893.04 | 11.03 |
| 21893.04 | 11.03 |
| 40089.45 | 9.77  |
| 66407.58 | 5.11  |
| 37429.25 | 8.97  |
| 77514.87 | 8.84  |
| 17718.45 | 10.99 |
| 469083.6 | 6.75  |
| 465382.3 | 6.81  |
| 27744.25 | 10.37 |
| 25624.29 | 9.13  |
| 28328.85 | 10.09 |
| 47534.77 | 6.28  |
| 47500.76 | 6.28  |
| 18013.24 | 6.43  |
| 17971.14 | 7.73  |
| 18008.31 | 7.68  |
| 18012.3  | 7.68  |
| 29597.37 | 10.16 |
| 29578.33 | 10.11 |
| 27259.47 | 9.95  |
| 29597.37 | 10.16 |
| 48509.93 | 5.69  |
| 51027.65 | 5.19  |
| 51057.68 | 5.19  |
| 50975.66 | 5.39  |
| 47556.84 | 5.46  |
| 308772.9 | 9.11  |
| 316907.3 | 9.17  |
| 41904.84 | 10.44 |
| 35923.75 | 9.87  |
| 29374.12 | 10.23 |
| 29504.17 | 10.09 |
| 35122.98 | 10.01 |
| 50957.08 | 8.42  |
| 55804.35 | 6.44  |
| 39817.02 | 8.3   |
| 39419.55 | 8.3   |
| 39339.61 | 8.65  |
| 24823.4  | 6.81  |
| 24887.53 | 6.29  |
| 24700.19 | 6.41  |
| 24799.32 | 6.88  |
| 25023.66 | 7.59  |
| 10058.47 | 5.81  |



|          |       |
|----------|-------|
| 36910.7  | 7.8   |
| 92467.76 | 4.76  |
| 65952.54 | 5.08  |
| 92338.65 | 4.77  |
| 22579.88 | 10.91 |
| 29225.43 | 10.66 |
| 69475.67 | 6.02  |
| 65963.62 | 5.64  |
| 71013.21 | 5.75  |
| 43220.14 | 9.54  |
| 76613.47 | 4.6   |
| 68441.34 | 4.55  |
| 58553.77 | 4.57  |
| 65961.34 | 4.45  |
| 57220.64 | 9.22  |
| 358195.1 | 5.86  |
| 16272.53 | 10.07 |
| 17222.08 | 10.53 |
| 13015.29 | 11.01 |
| 12985.28 | 10.98 |
| 8217.79  | 10.1  |
| 22110.09 | 8.27  |
| 22200.26 | 8.58  |
| 87132.74 | 5.19  |
| 124343.9 | 6.18  |
| 55209.69 | 6.77  |
| 65820.82 | 7.27  |
| 61515.33 | 8.07  |
| 71173.63 | 7     |
| 66784.67 | 6.61  |
| 68965.12 | 6.99  |
| 63980.95 | 8.54  |
| 59153.3  | 8.78  |
| 51450.53 | 7.65  |
| 53600.22 | 9.14  |
| 58538.47 | 8.76  |
| 55943.51 | 8.66  |
| 55973.53 | 8.66  |
| 60562.56 | 9.17  |
| 67761.68 | 9.02  |
| 69147.29 | 9.06  |
| 69086.33 | 9.01  |
| 46011.85 | 11.36 |
| 47696.77 | 11.07 |
| 48995.28 | 11.02 |
| 37656.55 | 11.03 |
| 100645.4 | 5.56  |
| 47556.99 | 7.59  |
| 81066.53 | 8.22  |
| 80438.72 | 8.63  |

|          |       |
|----------|-------|
| 72574.86 | 8.82  |
| 80271.54 | 8.53  |
| 12918.06 | 11.92 |
| 16621.23 | 11.84 |
| 10333.96 | 11.82 |
| 15508.08 | 11.13 |
| 14052.44 | 11.34 |
| 15403.91 | 11.13 |
| 15387.84 | 11.27 |
| 55690.37 | 8.62  |
| 55674.33 | 8.62  |
| 54653.14 | 8.52  |
| 55083    | 5.45  |
| 60046.79 | 5.59  |
| 61053.94 | 5.7   |
| 60679.52 | 5.83  |
| 58570.18 | 5.82  |
| 32081.98 | 5.29  |
| 33611.58 | 5     |
| 22651.63 | 9.95  |
| 28915.87 | 8.39  |
| 31947.84 | 5.1   |
| 33669.62 | 4.95  |
| 32142    | 4.93  |
| 25256.31 | 9.83  |
| 32071.94 | 5.29  |
| 32029.09 | 5.48  |
| 32238.03 | 4.94  |
| 33570.49 | 4.95  |
| 31971.29 | 8.8   |
| 33280.3  | 5.11  |
| 88357.88 | 5.51  |
| 94464.97 | 5.82  |
| 99966.01 | 5.71  |
| 94622.15 | 5.87  |
| 9200.65  | 9.72  |
| 52736.67 | 9.66  |
| 62639.8  | 9.62  |
| 53927.96 | 9.65  |
| 43234.01 | 9.8   |
| 43266.08 | 9.8   |
| 56374.86 | 9.71  |
| 52624.61 | 9.73  |
| 58969.55 | 9.57  |
| 34861.49 | 9.53  |
| 53989.07 | 9.63  |
| 52768.73 | 9.66  |
| 38138.25 | 5.37  |
| 55307.87 | 5.25  |
| 48112.6  | 4.95  |

|          |       |
|----------|-------|
| 56559.22 | 5.26  |
| 18863    | 11.77 |
| 18731.93 | 11.82 |
| 18755.97 | 11.59 |
| 21728.28 | 11.73 |
| 21634.23 | 11.73 |
| 27486.2  | 7.14  |
| 27968.6  | 6     |
| 28067.73 | 6.19  |
| 28067.73 | 6.19  |
| 34910.38 | 6.28  |
| 34910.34 | 6.07  |
| 32014.53 | 6.63  |
| 34938.4  | 6.29  |
| 34165.96 | 9.3   |
| 19950.88 | 9.77  |
| 20252.15 | 9.64  |
| 20252.15 | 9.64  |
| 20094    | 9.64  |
| 14922.91 | 9.03  |
| 52163.66 | 5.42  |
| 31450.84 | 5.73  |
| 52129.6  | 5.36  |
| 52163.62 | 5.36  |
| 31510.94 | 5.73  |
| 52163.62 | 5.36  |
| 56423.24 | 6.52  |
| 22192.6  | 9.97  |
| 63181.55 | 9.46  |
| 22474.94 | 9.94  |
| 64745.56 | 9.47  |
| 54708.14 | 9.53  |
| 63191.58 | 9.46  |
| 56110.33 | 7.8   |
| 37275.71 | 8.47  |
| 57936.25 | 7.96  |
| 55925.94 | 7.2   |
| 49897.22 | 7.96  |
| 40163.12 | 8.16  |
| 53044.56 | 6.39  |
| 21144.87 | 4.97  |
| 21931.83 | 5.03  |
| 15603.49 | 4.73  |
| 28112.17 | 4.76  |
| 28082.08 | 4.76  |
| 10584.09 | 5.65  |
| 106649.1 | 9.26  |
| 48901.76 | 5.9   |
| 48882.71 | 5.87  |
| 10728.75 | 6.3   |

|          |       |
|----------|-------|
| 84870.34 | 6.18  |
| 75963.38 | 6.36  |
| 84872.31 | 6.18  |
| 57115.66 | 4.76  |
| 51187.09 | 4.82  |
| 55380.57 | 4.68  |
| 21252.37 | 4.47  |
| 51252.28 | 4.77  |
| 52501.53 | 4.76  |
| 51125.06 | 4.82  |
| 31432.75 | 4.51  |
| 31462.77 | 4.48  |
| 44551.72 | 6.1   |
| 20371.19 | 8.7   |
| 25711.52 | 6.24  |
| 25744.36 | 5.99  |
| 25674.44 | 6.91  |
| 25684.26 | 5.99  |
| 25561.07 | 5.6   |
| 25674.44 | 6.91  |
| 17389.88 | 6.08  |
| 27616.74 | 6.24  |
| 21134.13 | 8.38  |
| 27605.7  | 6.91  |
| 174383.1 | 8.82  |
| 33064.1  | 9.78  |
| 32851.84 | 9.71  |
| 32865.87 | 9.76  |
| 35293.5  | 9.83  |
| 17307.79 | 9.76  |
| 35021.46 | 9.91  |
| 32865.87 | 9.76  |
| 33080.1  | 9.78  |
| 35382.69 | 9.86  |
| 12537.52 | 11.07 |
| 6759.69  | 9.78  |
| 6472.46  | 10    |
| 10645.2  | 10.71 |
| 21396.8  | 10.18 |
| 19785.79 | 10.05 |
| 15959.33 | 10.53 |
| 20246.51 | 10.21 |
| 6504.49  | 10.35 |
| 12192.98 | 10.34 |
| 154725.6 | 5.14  |
| 166575.9 | 5.18  |
| 20170.26 | 10.1  |
| 271610.1 | 5.4   |
| 24636.11 | 6.7   |
| 20682.59 | 6.37  |

|          |       |
|----------|-------|
| 30357.58 | 6.24  |
| 59749.91 | 9.16  |
| 57546.41 | 9.31  |
| 29203.92 | 5.72  |
| 17818.38 | 9.48  |
| 21482.58 | 10.12 |
| 128253.1 | 9.38  |
| 14960.81 | 9.64  |
| 14761.71 | 9.72  |
| 14569.77 | 10.05 |
| 13058.06 | 9.62  |
| 46108.35 | 10.19 |
| 40144.26 | 10.3  |
| 31243    | 9.97  |
| 28581.21 | 10.17 |
| 40266.63 | 10.02 |
| 42752.46 | 10.01 |
| 39382.66 | 10.06 |
| 33737.04 | 10.07 |
| 78845.72 | 8.28  |
| 78792.68 | 8.18  |
| 75725.15 | 8.12  |
| 17751.86 | 11.66 |
| 17951.11 | 11.67 |
| 17367.36 | 11.24 |
| 13292.81 | 11.48 |
| 35540.12 | 5.22  |
| 35510.09 | 5.22  |
| 9630.83  | 6     |
| 33552.95 | 5.73  |
| 21415.71 | 6.03  |
| 19401.43 | 5.58  |
| 31594.96 | 5.47  |
| 30790.63 | 5.65  |
| 26712.2  | 6.9   |
| 22870.85 | 6.44  |
| 26942.47 | 8.21  |
| 29944.59 | 9.75  |
| 29954.63 | 9.75  |
| 11572.36 | 9.26  |
| 25886.78 | 9.46  |
| 29974.62 | 9.75  |
| 25607.68 | 9.68  |
| 22136.65 | 10.25 |
| 7285.28  | 9.43  |
| 20307.59 | 9.88  |
| 14445.62 | 9.86  |
| 23746.62 | 10.21 |
| 22572.38 | 9.78  |
| 20293.56 | 9.88  |

|          |       |
|----------|-------|
| 22126.56 | 10.09 |
| 29995.24 | 10.61 |
| 15636.27 | 10.06 |
| 16539.33 | 10.01 |
| 21544.51 | 11.02 |
| 17694.83 | 10.44 |
| 17507.29 | 10.21 |
| 17691.79 | 10.46 |
| 19639.93 | 10.54 |
| 21915.88 | 10.49 |
| 7923.19  | 9.22  |
| 19254.71 | 10.47 |
| 24422.81 | 7.01  |
| 26223.86 | 6.5   |
| 26815.72 | 9.62  |
| 14730.79 | 5.89  |
| 22534.81 | 8.87  |
| 24831.02 | 9.94  |
| 23535.56 | 10.08 |
| 191612.4 | 5.48  |
| 68477.49 | 9.37  |
| 61285.91 | 9.2   |
| 64928.66 | 9.42  |
| 32070.64 | 9.87  |
| 66021.66 | 5.63  |
| 67817.36 | 9.34  |
| 62059.66 | 5.51  |
| 58150.12 | 5.15  |
| 253922.2 | 5.73  |
| 44893.39 | 5.75  |
| 31263.45 | 11.59 |
| 14437.03 | 10.1  |
| 18268.95 | 5.15  |
| 39487.2  | 11.4  |
| 15809.69 | 10.12 |
| 37253.73 | 10.96 |
| 31864.94 | 10.95 |
| 44200.42 | 11.39 |
| 48084.21 | 11.79 |
| 18284.95 | 5.04  |
| 56707.71 | 11.52 |
| 56677.69 | 11.52 |
| 39586.34 | 11.42 |
| 55102.37 | 5.31  |
| 55102.37 | 5.31  |
| 51971.9  | 5.53  |
| 55363.6  | 5.59  |
| 51997.93 | 5.48  |
| 32728.27 | 4.78  |
| 24544.41 | 8.33  |

|          |      |
|----------|------|
| 65537.21 | 6.54 |
| 55075.34 | 5.31 |
| 32704.29 | 4.75 |
| 27327.75 | 8.18 |
| 19747.18 | 6.22 |
| 38433.71 | 7.61 |
| 33611.76 | 8.62 |
| 31481.07 | 6.93 |
| 23076.22 | 5.03 |
| 22962.19 | 9.41 |
| 12640.42 | 8.61 |
| 29723.93 | 9.21 |
| 22961.21 | 9.47 |
| 23811    | 9.6  |
| 74402.76 | 5.33 |
| 23631.27 | 5.4  |
| 218002.1 | 5.62 |
| 226589.1 | 6.92 |
| 223047   | 5.82 |
| 92026.22 | 5.51 |
| 120867.5 | 5.89 |
| 113136.3 | 6.03 |
| 215282   | 5.65 |
| 110083.7 | 5.58 |
| 120891.5 | 5.89 |
| 121306.2 | 6.09 |
| 217101   | 5.59 |
| 86870.71 | 5.84 |
| 144280.1 | 6.29 |
| 93515.5  | 7.35 |
| 140669   | 6.24 |
| 217896.9 | 7.17 |
| 133936.6 | 8.99 |
| 130548.7 | 8.8  |
| 90044.23 | 8.98 |
| 17292.1  | 4.86 |
| 13607.89 | 4.79 |
| 63269.96 | 8.72 |
| 31679.22 | 9.25 |
| 16123.72 | 4.84 |
| 62130.7  | 5.9  |
| 52880.65 | 9.21 |
| 45157.63 | 9.3  |
| 27476.24 | 6.55 |
| 40523.72 | 9.23 |
| 96342.16 | 8.12 |
| 87549.46 | 8.4  |
| 61856.36 | 5.32 |
| 26695.05 | 5.07 |
| 61868.46 | 5.43 |

|          |       |
|----------|-------|
| 37489.59 | 6.6   |
| 54174.2  | 5.59  |
| 69394.17 | 5.22  |
| 60675.32 | 5.09  |
| 69852.74 | 5.18  |
| 55400.06 | 9.15  |
| 34086.39 | 10.02 |
| 36998.99 | 10.04 |
| 34430.9  | 8.58  |
| 55172.75 | 9.03  |
| 83553.41 | 8.31  |
| 461153.6 | 5.7   |
| 43083.78 | 6.01  |
| 41193.94 | 5.84  |
| 46444.25 | 6.93  |
| 41183.9  | 5.84  |
| 292276.5 | 5.52  |
| 271251.2 | 5.64  |
| 61639.7  | 8.6   |
| 6457.5   | 9.78  |
| 77153.26 | 9.13  |
| 77153.26 | 9.13  |
| 56989.5  | 9.32  |
| 105835.1 | 5.25  |
| 94729.11 | 6.86  |
| 91020.5  | 5.69  |
| 105837.1 | 5.25  |
| 16587.96 | 8.44  |
| 214351.9 | 6.18  |
| 108671   | 5.77  |
| 22170.9  | 5.55  |
| 22016.71 | 5.25  |
| 22197.93 | 5.55  |
| 18482.92 | 5.6   |
| 121886.3 | 9.07  |
| 228227.6 | 5.87  |
| 111334.1 | 5.16  |
| 104777.4 | 5.57  |
| 110439.9 | 5.15  |
| 94198.34 | 4.96  |
| 109704.3 | 5.87  |
| 72846.09 | 4.84  |
| 11963    | 5.16  |
| 12910.05 | 8.74  |
| 80366.94 | 6.35  |
| 83964    | 6.38  |
| 79082.93 | 6.47  |
| 79084.9  | 6.38  |
| 49423.03 | 5.5   |
| 80309.93 | 6.27  |



|          |       |
|----------|-------|
| 84820.78 | 8.99  |
| 71610.53 | 9.12  |
| 95647.4  | 7.52  |
| 95677.29 | 6.49  |
| 95737.39 | 6.49  |
| 86121.22 | 8.93  |
| 47837.57 | 4.93  |
| 20253.91 | 4.42  |
| 19484.07 | 4.44  |
| 23193.52 | 4.97  |
| 18992.09 | 5.3   |
| 46937.58 | 4.92  |
| 9525.15  | 3.76  |
| 30057.7  | 5.34  |
| 19523.54 | 4.96  |
| 47819.51 | 4.89  |
| 47819.51 | 4.89  |
| 47655.13 | 4.74  |
| 101455.3 | 8.68  |
| 101430.2 | 8.72  |
| 114084.3 | 8.86  |
| 6678.8   | 9.75  |
| 48955.65 | 6.47  |
| 65922.56 | 6.1   |
| 62350.4  | 5.82  |
| 16245.58 | 9.43  |
| 67587.64 | 5.9   |
| 59760.84 | 5.88  |
| 83653.44 | 4.56  |
| 83671.48 | 4.56  |
| 16536.86 | 9.38  |
| 11488.1  | 9.27  |
| 16536.86 | 9.38  |
| 15769.47 | 10.56 |
| 16358.86 | 10.59 |
| 14256.8  | 10.46 |
| 15797.53 | 10.56 |
| 9740.46  | 10.59 |
| 19329.38 | 11.64 |
| 18814.77 | 10.69 |
| 27366.23 | 11.83 |
| 14202.95 | 10.13 |
| 26927.75 | 11.86 |
| 19329.38 | 11.64 |
| 49144.13 | 7.72  |
| 49176.2  | 7.72  |
| 31009.48 | 9.14  |
| 39948.22 | 9.43  |
| 39928.23 | 9.43  |
| 40094.41 | 9.45  |

|          |       |
|----------|-------|
| 39932.18 | 9.43  |
| 36160.83 | 9.35  |
| 83084.08 | 8.95  |
| 79714.78 | 8.03  |
| 86859.6  | 6.07  |
| 90583.42 | 5.76  |
| 57662.65 | 9.42  |
| 25793.41 | 5.59  |
| 37846.89 | 6.06  |
| 27512.24 | 6.85  |
| 32246.77 | 9.13  |
| 32995.66 | 9.23  |
| 36430.37 | 8.88  |
| 29205.41 | 9.46  |
| 43159.02 | 9.04  |
| 40068.53 | 9.06  |
| 47117.61 | 8.99  |
| 16163.87 | 5.16  |
| 26072.76 | 10.67 |
| 32741.5  | 10.62 |
| 32890.68 | 10.59 |
| 32725.54 | 10.59 |
| 32727.51 | 10.59 |
| 32701.48 | 10.62 |
| 12508.06 | 8.38  |
| 24955.21 | 7.07  |
| 21700.51 | 7.62  |
| 28651.35 | 9.98  |
| 28623.33 | 9.94  |
| 46806.31 | 10.25 |
| 65258.03 | 9.77  |
| 68061.99 | 9.95  |
| 65260    | 9.73  |
| 61215.31 | 6.06  |
| 18195.07 | 6.04  |
| 73170.5  | 6.94  |
| 44841.14 | 6.43  |
| 73152.78 | 7.24  |
| 72930.63 | 8.4   |
| 58773.56 | 7.62  |
| 74577.99 | 7.72  |
| 40186.67 | 7.9   |
| 73242.57 | 6.73  |
| 74079.4  | 6.76  |
| 104834.6 | 8.6   |
| 209241.7 | 7.07  |
| 112606.9 | 8.18  |
| 105605.5 | 8.68  |
| 105887.9 | 8.32  |
| 36320.27 | 6.35  |

|          |       |
|----------|-------|
| 13203.25 | 9.33  |
| 17699.18 | 5.86  |
| 20510.54 | 6.6   |
| 14552.9  | 7.83  |
| 13335.52 | 10.79 |
| 12700.78 | 11    |
| 14494.75 | 10.54 |
| 15118.41 | 10.37 |
| 14462.69 | 10.54 |
| 8987.61  | 10.88 |
| 13955.18 | 10.66 |
| 64277.41 | 9.77  |
| 83538.2  | 9.4   |
| 29296.4  | 9.51  |
| 40540.74 | 5.94  |
| 48023.24 | 10.57 |
| 39817.91 | 6.12  |
| 59378.91 | 10.1  |
| 56332.72 | 10.4  |
| 56743.25 | 10.41 |
| 57443.69 | 10.28 |
| 56410.48 | 10.04 |
| 40526.72 | 5.94  |
| 36464    | 5.52  |
| 58404.87 | 10.24 |
| 36585.07 | 5.45  |
| 30593.76 | 5.96  |
| 56539.74 | 6.71  |
| 6262.62  | 10.67 |
| 12655.75 | 9.59  |
| 94511.45 | 5.63  |
| 94504.42 | 5.65  |
| 97560.66 | 5.56  |
| 91952.76 | 5.78  |
| 12783.92 | 9.65  |
| 97657.86 | 5.69  |
| 91938.73 | 5.78  |
| 20509.67 | 11.28 |
| 19338.35 | 11.93 |
| 24145.77 | 11.62 |
| 15722.15 | 11    |
| 198270.4 | 5.51  |
| 198210.3 | 5.51  |
| 196321.3 | 5.54  |
| 170579.5 | 5.97  |
| 122823.3 | 7.54  |
| 170589.5 | 5.98  |
| 267466.7 | 5.68  |
| 356937.8 | 5.85  |
| 13568.92 | 8.6   |

|          |       |
|----------|-------|
| 25593.52 | 11    |
| 22388.99 | 10.77 |
| 28024.32 | 11.04 |
| 16179.71 | 11.89 |
| 10644.63 | 10.3  |
| 14551.29 | 11.04 |
| 23851.09 | 6.53  |
| 68949.97 | 6.74  |
| 119747.3 | 8.07  |
| 159062.6 | 8.14  |
| 7875.25  | 4.5   |
| 17415.31 | 9.08  |
| 12482.44 | 5.78  |
| 10302.12 | 5.28  |
| 15845.38 | 6.58  |
| 9787.4   | 5.3   |
| 54081.04 | 6.06  |
| 54169.15 | 5.98  |
| 186257.7 | 6.41  |
| 192093.3 | 6.12  |
| 119429.6 | 5.95  |
| 7209.18  | 5.18  |
| 4771.37  | 4.6   |
| 10349.73 | 6.81  |
| 10365.77 | 6.89  |
| 5426.17  | 5.21  |
| 48224.51 | 6.08  |
| 31036.98 | 5.95  |
| 48282.54 | 5.98  |
| 30983.94 | 5.79  |
| 10365.77 | 6.89  |
| 30455.74 | 5.9   |
| 26900.98 | 9.05  |
| 34213.01 | 5.72  |
| 34239.09 | 5.72  |
| 27298.34 | 8.36  |
| 13828.37 | 9.83  |
| 26878.89 | 8.46  |
| 18270.23 | 9.65  |
| 15813.36 | 9.55  |
| 34273.11 | 5.72  |
| 27435.48 | 8.36  |
| 17441.4  | 9.57  |
| 27187.29 | 9.11  |
| 6785.86  | 9.74  |
| 34301.12 | 5.72  |
| 28538.24 | 4.69  |
| 34364.08 | 5.41  |
| 105474.4 | 5.25  |
| 104335.2 | 5.29  |

|          |       |
|----------|-------|
| 104551.4 | 5.22  |
| 104222   | 5.19  |
| 105700.6 | 5.16  |
| 105680.5 | 5.22  |
| 61082.01 | 4.84  |
| 101331.4 | 5.14  |
| 101303.3 | 5.14  |
| 38347.07 | 8.16  |
| 76242.86 | 5.08  |
| 20780.34 | 9.69  |
| 69902.18 | 6.19  |
| 123508.8 | 8.91  |
| 972993.3 | 5.7   |
| 868473.9 | 5.69  |
| 42761.77 | 6.08  |
| 42186.15 | 6.08  |
| 42202.2  | 6.08  |
| 42202.2  | 6.08  |
| 38055.23 | 5.48  |
| 40306.73 | 5.9   |
| 18355.81 | 8.33  |
| 42203.18 | 5.96  |
| 48033.06 | 8.92  |
| 111965.2 | 8.89  |
| 113927.4 | 8.82  |
| 113936.3 | 8.79  |
| 122549   | 9.3   |
| 294478.5 | 9.38  |
| 430402.3 | 9.28  |
| 277264.3 | 9.4   |
| 91099.41 | 9.36  |
| 259704.8 | 9.48  |
| 435164.4 | 9.24  |
| 11477.47 | 10.17 |
| 5750.04  | 11.05 |
| 14823.3  | 10.14 |
| 5671.93  | 11.05 |
| 14839.34 | 10.14 |
| 12303.27 | 9.18  |
| 14839.34 | 10.14 |
| 27167.94 | 9.6   |
| 6020.24  | 11.01 |
| 20005.6  | 4.1   |
| 31379.85 | 4.74  |
| 31361.88 | 4.74  |
| 20133.72 | 4.1   |
| 208073.7 | 6.22  |
| 210934.9 | 6.25  |
| 24041.6  | 10.28 |
| 211195.2 | 6.22  |

|          |       |
|----------|-------|
| 207813.4 | 6.25  |
| 15155.77 | 10.96 |
| 25502.14 | 11.86 |
| 15527.17 | 11.07 |
| 32287.16 | 11.72 |
| 13813.87 | 10.46 |
| 24189.65 | 11.94 |
| 25476.06 | 11.86 |
| 20450.19 | 9.88  |
| 22384.59 | 11.64 |
| 19442.98 | 9.81  |
| 21352.11 | 9.88  |
| 23194.63 | 11.83 |
| 24152.64 | 11.85 |
| 5082.75  | 9.4   |
| 5238.93  | 9.82  |
| 5733.52  | 10.16 |
| 14786.81 | 9.21  |
| 10421.77 | 9.65  |
| 9098.41  | 9.94  |
| 11168.4  | 6.35  |
| 14817.83 | 9.34  |
| 233827.8 | 6.9   |
| 224292.2 | 5.43  |
| 231601.3 | 6.56  |
| 233817.8 | 6.9   |
| 31093.88 | 9.48  |
| 14244.01 | 4.63  |
| 76252.93 | 8.89  |
| 63168.9  | 9.06  |
| 8711.89  | 9.58  |
| 95425.47 | 6.95  |
| 140255   | 5.87  |
| 25202.98 | 5.64  |
| 14863.41 | 5.64  |
| 16772.61 | 6.13  |
| 31637.74 | 6.65  |
| 20636.98 | 6.17  |
| 36977.63 | 6.19  |
| 27923.35 | 5.93  |
| 17140.06 | 5.43  |
| 17195.09 | 5.07  |
| 8710.82  | 7.99  |
| 8757.79  | 7.79  |
| 25604.91 | 9.88  |
| 31336.12 | 10.25 |
| 10540.95 | 9.29  |
| 31324.07 | 10.25 |
| 17002.34 | 9.97  |
| 31296.02 | 10.25 |

|          |       |
|----------|-------|
| 21068.43 | 9.98  |
| 21153.69 | 9.86  |
| 31384.17 | 10.25 |
| 25210.85 | 10.26 |
| 50649.86 | 6.27  |
| 68358.63 | 9.01  |
| 67860.06 | 9.01  |
| 69600.84 | 8.84  |
| 67006.9  | 8.42  |
| 70901.11 | 7.57  |
| 69601.78 | 8.68  |
| 52045.88 | 9.19  |
| 59606.09 | 8.82  |
| 70942.21 | 8.23  |
| 55717.49 | 9.26  |
| 46918.38 | 4.3   |
| 48140.96 | 4.29  |
| 24286.78 | 4.91  |
| 162769   | 6.25  |
| 33264.91 | 9.51  |
| 172118.6 | 6.44  |
| 13242.64 | 5.21  |
| 11134.31 | 5.84  |
| 29246.52 | 5.75  |
| 28542.72 | 5.9   |
| 29262.52 | 5.75  |
| 19062.24 | 5.45  |
| 29356.38 | 8.5   |
| 37028.63 | 8.46  |
| 34188.81 | 8.18  |
| 39594.48 | 9.1   |
| 10688.8  | 9.6   |
| 10884.2  | 9.99  |
| 10658.77 | 9.6   |
| 10674.73 | 9.52  |
| 9535.46  | 9.05  |
| 12434.56 | 9.4   |
| 24265.17 | 11.65 |
| 24261.18 | 11.65 |
| 24261.18 | 11.65 |
| 14692.13 | 12.12 |
| 9166.47  | 10.28 |
| 28198.66 | 6.15  |
| 27091.29 | 5.75  |
| 26486.8  | 6.87  |
| 19400.86 | 5.69  |
| 32528.49 | 7.46  |
| 20819.46 | 11.44 |
| 23134.28 | 11.48 |
| 23466.66 | 11.41 |

|          |       |
|----------|-------|
| 23465.71 | 11.48 |
| 23247.44 | 11.48 |
| 57499.72 | 6.51  |
| 36554.25 | 6.16  |
| 42341.02 | 5.64  |
| 54107.12 | 6.34  |
| 211072   | 5.31  |
| 251890.6 | 5.51  |
| 186491.4 | 5.25  |
| 233514.4 | 5.4   |
| 249479.1 | 5.54  |
| 39156.61 | 10.37 |
| 3393.78  | 6.74  |
| 20314.64 | 6.22  |
| 20372.68 | 5.37  |
| 12060.29 | 7.94  |
| 14632.35 | 6.15  |
| 14965.73 | 6.15  |
| 13379.89 | 5.09  |
| 12639.92 | 7.92  |

---



**Supplementary Table 2. Real-time RT-PCR primers**

| Real-time RT-PCR primer | Sequence (5'-3')     | Real-time RT-PCR primer | Sequence (5'-3')     |
|-------------------------|----------------------|-------------------------|----------------------|
| -actin-RT-F             | CCAACCGCGAGAAGATGA   | Trps1-RT-F              | TCTACCAGAAGCTTCACTCG |
| -actin-RT-R             | CCAGAGGCGTACAGGGATAG | Trps1-RT-R              | CTCTCTAACGGGCTTCCATT |

**Supplementary Table 3. ChIP-qPCR primers**

| Gene Symbols | Sense sequence (5'-3') | Anti-sense equence (5'-3') |
|--------------|------------------------|----------------------------|
| CDC16        | CATTGGTCTCTTCCCCTGA    | CAAATGAAAGTCAAAGACAACCT    |
| CCNA2        | GTGCCCCAGATTTTAGACCT   | GTCCGAAGGCTGACTCTAAG       |
| CCNB1        | AACAACACGGATACACCCCC   | TCAGCGACTTAGATGACTTTGC     |
| CDK1         | ATGAGGTAGAAACAAAGCAC   | AAGAAGGAAATGGAAAACCT       |
| Untr4        | CTCCCTCCTGTGCTTCTCAG   | AATGAACGTGTCTCCAGAA        |
| Untr12       | TGGACCTTTACCTGCTTTATCA | AGCAAGGACTAGGATGACAGAA     |
